1           **Loss of transcriptional heterogeneity in aged human muscle stem cells**

2

3   **Authors:** Emilie Barruet<sup>1,2</sup>, Katharine Striedinger<sup>1,2</sup>, Pauline Marangoni<sup>2</sup> and Jason H. Pomer-  
4   antz<sup>1</sup>

5   **Affiliations:**

6   <sup>1</sup> Departments of Surgery and Orofacial Sciences, Division of Plastic and Reconstructive Sur-  
7   gery, Program in Craniofacial Biology, Eli and Edythe Broad Center of Regeneration Medicine,  
8   University of California San Francisco, 94143, USA.

9   <sup>2</sup> Program in Craniofacial Biology and Department of Orofacial Sciences, University of Califor-  
10   nia, San Francisco, CA, USA.

11

12   Corresponding Author:

13   Address correspondence to Jason H. Pomerantz

14   e-mail: [Jason.Pomerantz@ucsf.edu](mailto:Jason.Pomerantz@ucsf.edu)

15

16

17

18

19

20 **ABSTRACT:**

21 Age-related loss of muscle mass and function negatively impacts healthspan and lifespan. Satel-  
22 lite cells function as muscle stem cells in muscle maintenance and regeneration by self-renewal,  
23 activation, proliferation and differentiation. These processes are perturbed in aging at the stem  
24 cell population level, contributing to muscle loss. However, how representation of subpopula-  
25 tions within the human satellite cell pool change during aging remains poorly understood. We  
26 previously reported a comprehensive baseline of human satellite cell (Hu-MuSCs) transcriptional  
27 activity in muscle homeostasis describing functional heterogenous human satellite cell subpopu-  
28 lations such as CAV1+ Hu-MUSCs (Barruet et al., 2020). Here, we sequenced additional satel-  
29 lite cells from new healthy donors and performed extended transcriptomic analyses with regard  
30 to aging. We found an age-related loss of global transcriptomic heterogeneity and identified new  
31 markers (*CAV1*, *CXCL14*, *GPX3*) along with previously described ones (*FNI*, *ITGB1*, *SPRY1*)  
32 that are altered during aging in human satellite cells. These findings describe new transcriptomic  
33 changes that occur during aging in human satellite cells and provide a foundation for understand-  
34 ing functional impact.

## 35 **INTRODUCTION:**

36 Aging in skeletal muscle is characterized by a decline in muscle mass and regenerative capacity  
37 manifested in humans by decreased muscle strength and slow healing after injury (Curtis, Litwic,  
38 Cooper, & Dennison, 2015; Distefano & Goodpaster, 2018). At the cellular level, muscle fiber  
39 growth, turnover and regeneration are driven by muscle stem cells also known as satellite cells  
40 (Chang & Rudnicki, 2014), characterized by the expression of PAX7. Satellite cells undergo ac-  
41 tivation and proliferation upon injury, and then either differentiate to generate new muscle fibers  
42 or return to a quiescent state to reconstitute the satellite cell pool. Therefore alterations in satel-  
43 lite cells during aging could underlie associated changes in muscle bulk and function.

44           There has been discordance in the literature with several studies reporting age-  
45 related loss in number and function of satellite cells (Chakkalakal, Jones, Basson, & Brack,  
46 2012; Conboy, Conboy, Smythe, & Rando, 2003; Sousa-Victor et al., 2014) while others have  
47 reported no significant reduction or change (Arpke et al., 2021; Schäfer, Zweyer, Knauf,  
48 Mundegar, & Wernig, 2005). We observed a modest decrease in satellite cell number in samples  
49 from elderly (>81 years) human individuals (Garcia et al., 2018). Age can also cause intrinsic  
50 changes of satellites cells, their niche or both (Brack & Muñoz-Cánoves, 2016; Chakkalakal et  
51 al., 2012; Ermolaeva, Neri, Ori, & Rudolph, 2018; García-Prat et al., 2016; Lukjanenko et al.,  
52 2016; Rozo, Li, & Fan, 2016). Recent advances in single-cell genomics have allowed the discov-  
53 ery of novel aspects of aging in different tissues, which includes changes in cell heterogeneity,  
54 distribution of cellular states and gene expression levels (Angelidis et al., 2019; Consortium,  
55 2020; Jacob C Kimmel et al., 2019; Kowalczyk et al., 2015). Studies in mice profiling the tran-  
56 scriptome of muscle stem cells along differentiation pathways have revealed age-related changes  
57 such as a decrease in expression of extracellular matrix (ECM), migration and adhesion genes

58 (Jacob C. Kimmel, Yi, Roy, Hendrickson, & Kelley, 2021). Most prior intrinsic satellite cell ag-  
59 ing studies have been performed in mice, with few efforts to translate those findings to humans  
60 (Snijders et al., 2015). Thus, a comprehensive characterization of the impact of aging on human  
61 satellite cells is still lacking.

62 We previously demonstrated that under homeostatic conditions, human satellite cells are  
63 transcriptionally heterogeneous, which enabled us to separate functionally distinct human satel-  
64 lite cell subpopulations (Barruet et al., 2020). Therefore, a comprehensive understanding of how  
65 the repartition of these subpopulations and their gene expression vary along with aging is now  
66 feasible. In this study, we used single cell RNA sequencing of satellite cells from additional hu-  
67 man muscle samples to further analyze existing datasets with regard to aging. We demonstrate  
68 that there is a loss of transcriptional heterogeneity with aging and identify new genes that are dif-  
69 ferentially expressed during aging.

## 70 **RESULTS**

### 71 **1- Decreased transcriptional heterogeneity in Hu-MuSCs during aging**

72 Our previous work identified functionally heterogenous human satellite cell subpopulations. We  
73 asked whether the distribution of those subpopulations or their transcriptome are altered in aging.  
74 We performed single cell RNA sequencing of highly purified human satellite cells from new  
75 healthy donors (**Figure 1- Source Data 1**) and pooled them with our previous dataset (Barruet et  
76 al., 2020). Our analysis workflow is described in **Figure 1A**. The single cell sequencing data for  
77 each sample were analyzed using SCANPY (F. Alexander Wolf, Angerer, & Theis, 2018),  
78 merged into their respective age group using the BBKNN (batch balanced k nearest neighbors)  
79 integration algorithm (Polański et al., 2019) to remove batch effect, and visualized in uniform  
80 manifold approximation and projection (UMAP) graphs (**Figure 1- figure supplement 1A-B**).  
81 Samples were distributed in 3 age groups: young [ $<30$  y.o.], adult [ $35-66$  y.o.] and aged [ $>70$   
82 y.o.]. All samples within each group were pooled. We identified 12, 9 and 10 clusters for the  
83 young, adult and aged groups, respectively. Myogenic, cycling and stemness genes were ex-  
84 pressed as previously described (Barruet et al., 2020) in each age group. Moreover, similar clus-  
85 ter markers such as AP-1 transcription factor unit (*JUN*, *FOS*), *COL1A1* (Collagen Type Alpha 1  
86 Chain), *SOX8* (Sry-Box Transcription Factor 8), *IGFBP7* (Insulin Like Growth Factor Binding  
87 Protein 7), *MXI*, *HSPA1A* (Heat Shock Protein A, Hsp70) or *CAVI* (Calveolin-1) were found in  
88 each age group (**Figure 1- figure supplement 1B**). To compare each age group to another, we  
89 used INGEST (De Santis, Etoc, Rosado-Olivieri, & Brivanlou, 2021; Stuart et al., 2019). Unlike  
90 BBKNN or CCA (Canonical Correlation Analysis, e.g. in Seurat) where datasets are integrated  
91 in a symmetric way, INGEST integrates asymmetric datasets into a ‘reference’ annotated dataset.  
92 We found that the clusters obtained in our grouped young samples were robustly defined by ac-

93 cepted markers, in addition to having the greatest transcriptional variability (estimated through a  
94 higher number of clusters). Hence, we used this young group as our ‘reference’ annotated dataset  
95 to best identify potential differences in the transcriptional signatures induced by aging (**Figure 1-**  
96 **figure supplement 1C**). This approach allowed us to detect the biological variation observed  
97 with aging.

98 Prior to mapping, the adult group of cells was downsampled to 11,000 cells to remove co-  
99 founder effect resulting from differences in cell number among the 3 age groups. Among the 12  
100 clusters, clusters 0-3, 5-7 and 10 consisted of quiescent Hu-MuSCs while cluster 4, 8, 9, 11 and  
101 12 consisted of muscle progenitors, cycling Hu-MuSCs, myoblasts, myocytes and mesenchymal  
102 cells, respectively. We confirmed that each Hu-MuSC cluster was found to have a unique tran-  
103 scriptomic fingerprint. Cluster 0 was characterized by the upregulation of *GNAS* and cluster 1 by  
104 the upregulation of *JUNB* and *FOS*. Cluster 2 contained the *CAVI* expression cells while cells  
105 expressing high levels of *SPRY1* (Sprouty RTK Signaling Antagonist 1) were found in cluster 5.  
106 Cluster 6 and 7 consisted of cells expressing cytokines *CCL2* and *CXCL14*. Finally, the recently  
107 described (Scaramozza et al., 2019) *MX1* satellite cell subpopulation was identified as cluster 10  
108 (**Figure 1B-C**).

109 The INGEST integration allowed us to compare the distribution of the young, adult and aged Hu-  
110 MuSCs among the different clusters. A UMAP based-density plot revealed a decrease of cluster  
111 coverage with aging (**Figure 1E** and **Figure 1-figure supplement 1D**). The majority of aged  
112 Hu-MuSCs were located in cluster 1 (65%, Hi *JUNB*, *FOS*) and cluster 7 (10.9%, *CXCL14*),  
113 while young Hu-MuSCs were distributed among a larger number of clusters such as cluster 2  
114 (14.8%,*CAVI*), cluster 3 (13.3%, Hi SPARC, (Secreted Protein Acidic and Cysteine Rich, an  
115 ECM protein (Jørgensen et al., 2017) ), SOD2 (Superoxide Dismutase 2)), cluster 5 (3.9% Hi

116 *SPRY1*) and cluster 6 (2.4%, *CCL2*). Adult cells were predominantly present in cluster 0  
117 (33.5%), 1 (48.9%) and 7 (5.1%) (**Figure 1D-E** and **Figure 1-figure supplement 1D-E**). Thus,  
118 distribution of cells per cluster varies with aging and there is a relative loss of transcriptional het-  
119 erogeneity in aged Hu-MuSCs.

120 Since the distribution of cells per cluster appears affected by aging, we aimed to investigate the  
121 direction and speed of movement of cells in clusters inferred by RNA velocities (La Manno et  
122 al., 2018). To understand the cellular dynamics of Hu-MuSCs and population kinetics during ag-  
123 ing, we applied the scVelo and partition-based graph abstraction (PAGA) trajectory algorithm  
124 (Bergen, Lange, Peidli, Wolf, & Theis, 2020). scVelo and PAGA analyses suggest that in young  
125 cells, cluster directionality is heterogenous, contrary to adult and aged cells where cell states ap-  
126 pear to commit to cluster 1 (**Figure 1F,G**). Since the weighted edges correspond to the connec-  
127 tivity between two clusters in the PAGA analysis, we were able to more closely investigate the  
128 connectivity between clusters. In the three age groups we found a strong connection axis be-  
129 tween clusters 1 (Hu-MuSCs, hi *JUNB*, *FOS*), 4 (Muscle Progenitors) and 9 (Myoblasts) with  
130 directional kinetics toward the less differentiated states. Aged cells from other Hu-MuSC clusters  
131 (0, 2, 3, 6, 10) converged toward cluster 1 while in the young age group, Hu-MuSC clusters ap-  
132 pear to be in a non-convergent steady state. We also found that cells from cluster 7 (*CXCL14*) in  
133 the young group were not connected to any other cluster in contrast to adult and aged cells (**Fig-**  
134 **ure 1G**). These findings suggest that aging Hu-MuSCs have a decrease in transcriptional hetero-  
135 geneity characterized by cluster specificity and convergent RNA velocity.

136

137 **2- Extracellular-matrix and adhesion gene expression decreases with aging in Hu-**  
138 **MuSCs**

139 Since we observed a loss in transcriptional heterogeneity, we asked which genes may be differ-  
140 entially expressed during aging. We excluded activated, differentiated and non-myogenic cells  
141 and focused on the Hu-MuSC clusters (0-3, 5-7 and 10) solely to assess modulations in tran-  
142 scriptional signatures and highlight age-related modifications (**Figure 2A,B**). We then identified  
143 differentially expressed genes for the three age groups, where each age group was compared to  
144 one another. Notably we found collagen genes (i.e. *COL3A1*) to be significantly expressed in  
145 young Hu-MuSCs, while *DUSP1* (can inactivate MAPK proteins and has been reported to in-  
146 crease upon Hu-MuSC activation in culture (Charville et al., 2015)) and *ZFAND5* (a proteasome  
147 activator (Lee, Takayama, & Goldberg, 2018)) were significantly expressed in adult Hu-MuSCs,  
148 and *CXCL14* and *GPX3* (Glutathione Peroxidase 3, a retinoid-responsive gene (El Haddad et al.,  
149 2012)) in aged Hu-MuSCs (**Figure 2C**). These results also corroborate previously described  
150 genes affected by aging such as *FNI* (Fibronectin 1), *ITGB1* (Integrin Subunit Beta-1), *SPRY1*  
151 (Lukjanenko et al., 2016; Rozo et al., 2016; Shea et al., 2010) which were decreased with aging.  
152 Moreover, expression of other ECM and adhesion related genes (*CAVI*, *COL1A2*) decreased  
153 aged cells. The expression of mTor pathway target genes such as *BCL2* and *VEGFA* (Vascular  
154 Endothelial Growth Factor A) was increased in adult and aged Hu-MuSCs (**Figure 2D**).

155 Since the distribution of cells among the different clusters as well as population kinetics changed  
156 with aging, we asked if the inferred directions described in **Figure 1F** were supported by any  
157 specific genes or transcriptional program. In comparing the three age groups, we found that  
158 genes including *CAVI*, *COL1A1*, *CDKN1C* (Cyclin Dependent Kinase Inhibitor 1C, regulates  
159 cell proliferation (Mademtzoglou et al., 2018)) and *GREM1* (Gremlin1, a BMP antagonist  
160 (Borok, Mademtzoglou, & Relaix, 2020)) had age-specific differential velocity expression mean-  
161 ing that those genes were transcribed at significantly higher or lower levels compared to their age



162 group counterpart (**Figure 2E,F**). The UMAP of velocity expression showed that *CAVI* and  
163 *COL1A1* had increased velocity in the clusters enriched in the young samples (cluster 2, 3 and 5)  
164 while *CDKN1C* and *GREM1* displayed increased velocity in clusters enriched with the adult  
165 (cluster 0) and aged (cluster 1) samples, respectively (**Figure 2F**). We also found additional  
166 genes with an age-specific significant differential velocity. These include *DIO2* (Type 2 Iodothy-  
167 ronine Deiodinase, converts thyroid prohormone (Buroker, 2014)), *EDN3* (Endothelin-3, mediates  
168 the release of vasodilators (Kawanabe & Nauli, 2011)), *NPTX2* (Neuronal Pentraxin 2, which  
169 affect tumor progression (Z. Wang et al., 2020)), *KLF6* (Krueppel-like Factor 6, a tumor sup-  
170 pressor (Tetreault, Yang, & Katz, 2013)), *LPL* (Lipoprotein Lipase, involved in lip metabolism  
171 (Wu, Kersten, & Qi, 2021)) and *MAP1B* (Microtubule Associated Protein (Halpain & Dehmelt,  
172 2006)). *DIO2*, *LPL*, *MAP1B*, *EDN3* were top ranked genes that explained the resulting vector  
173 field of young Hu-MuSCs with an increase in velocity. *NPTX2* and *KLF6* velocity were in-  
174 creased in cluster 1 and 7, clusters associated with adult and aged Hu-MuSCs (**Figure 2-figure**  
175 **supplement 1** and **Figure 2-Source Data 1**).

176 The gene ontology (GO) term analysis of differentially expressed genes in young, adult and aged  
177 Hu-MuSCs revealed an enrichment in ECM terms in young Hu-MuSCs although they were de-  
178 creased in aged Hu-MuSCs. Type I / IFN $\gamma$  signaling were decreased in young Hu-MuSCs. Terms  
179 associated with muscle processes were increased in aged Hu-MuSCs and downregulated in adult  
180 Hu-MuSCs. An enrichment of cellular response to oxygen levels and hypoxia terms was also de-  
181 tected in aged Hu-MuSCs (**Figure 3**).

182 To summarize, our approach resulted in the identification of novel aging-related markers such as  
183 *CAVI* and *GREM1* while verifying in Hu-MuSCs the expression levels of genes that have been  
184 previously associated with murine aging alterations.

185

186 **3- scRNAseq analysis also reveals transcriptomic changes during aging in muscle pro-**  
187 **genitor cells, cycling Hu-MuSCs and myoblasts**

188 Since our dataset also contained a large fraction of differentiated cells, we separately analyzed  
189 clusters encompassing the cycling Hu-MuSCs (cluster 8), muscle progenitors (cluster 4) and my-  
190 oblasts (cluster 9) (**Figure 4A**). Top differentially expressed genes in the muscle progenitors in-  
191 cluded *MEST* (Mesoderm Specific Transcript, a negative regulator of adipocyte differentiation  
192 (Karbiener et al., 2015)), *HSPG2* (Heparan Sulfate Proteoglycan 2, encodes for secreted mole-  
193 cule perlecan, deposited on all basement membrane (Martinez, Dhawan, & Farach-Carson,  
194 2018)), *OLFM2B* (Olfactomedin 2b, a regulator for TGF- $\beta$  (Shi, Guo, & Chen, 2014)) and  
195 *SPARC* for the young samples; *FOS*, Metallothionein genes (*MT1E* and *MT2A*) and *SPARCLI*  
196 (SPARC-like protein 1, an ECM protein that has been described as a differentiation promotor of  
197 C2C12 cells (Y. Wang, Liu, Yan, Li, & Tong, 2019)) for the adult samples; and *NUPRI* (Nucle-  
198 ar Protein 1 Transcription Regulator, a repressor of ferroptosis (J. Liu et al., 2021)), *TRDN* (Tri-  
199 adin, plays a role in muscle excitation-contraction (Marty & Fauré, 2016)), *MTRNR2L12* (an iso-  
200 form of humanin (Bik-Multanowski, Pietrzyk, & Midro, 2015)) for the aged samples. As with  
201 our Hu-MuSC explorations, GO term analysis of differentially expressed genes for differentiated  
202 cell clusters showed an enrichment of ECM and cell matrix adhesion terms in young muscle pro-  
203 genitors, along with an enrichment of muscle cell differentiation and interferon gamma terms in  
204 aged muscle progenitor cells. Similar analysis for the cycling Hu-MuSCs revealed a significant  
205 increase of *TUBA1B* (Tubulin Apla-1B, a cytoskeleton protein (Q. Q. Xu et al., 2020)), *TYMS*  
206 (Thymidylate Synthetase, a critical enzyme for DNA replication and DNA repair (Varghese et al.,  
207 2019)), *H2AFV* (H2A.Z Variant Histone 2), *STMN1* (Stathmin1, a microtubule-binding protein

208 (Jun Liu et al., 2021)) transcripts levels in young cells, similar to that of *SPARCLI*, *CXCL14*,  
209 *ZFP36* (ZFP36 Ring Finger Protein), *EIF1* (Eukaryote Translation Initiation Factor 1) in adult  
210 cells and Proteasome proteins (*PSMB10* and *PSMB9*), *PRDX1* (Peroxiredoxin 1, an antioxidant  
211 enzyme (Ding, Fan, & Wu, 2017)) and *SI00A16* (S100 Calcium Binding Protein A16) in aged  
212 cells. GO term analysis showed enrichment in DNA replication and cell cycle terms in young  
213 cycling Hu-MuSCs, cellular response to metal ion terms in adult cells and enrichment in antigen  
214 processing and Wnt signaling pathway in aged cycling Hu-MuSCs (**figure 4-figure supplement**  
215 **1**). Finally, *CDKNIC*, *RASSF4* (Ras Association Domain Family Member 4), *SPG21* (SPG21  
216 Abhydrolase Domain Containing, Maspardin, involved in repression of T cell activation  
217 (Soderblom et al., 2010)), *MYOG* (Myogenin) were significantly differentially expressed in  
218 young myoblasts, *TCF4* (Transcription Factor 4), *MTPN* (Myotrophin), *SAMD1* (Sterile Alpha  
219 Motif Domain Containing 1, an unmethylated CGI-binding protein (Stielow et al., 2021)) and  
220 *MAB21L1* (Mab-21 Like 1, a putative nucleoidyltransferase (Rad et al., 2019)) in adult my-  
221 oblasts and *MYBPCI* (Myosin Binding protein C1), *TNNC2* (Troponin C2, fast skeletal type),  
222 *TPMI* (Tropomyosin) and *TBX3* (T-Box Transcription Factor 3) in aged myoblasts. Mitochondrial  
223 translation terms were enriched in young myoblasts while muscle processes, differentiation and  
224 development were enriched in aged myoblast (**Figure 4B** and **figure 4-figure supplement 2**).

225 In addition, we found that *CDKN2A* (Cyclin Dependent Kinase Inhibitor 2A) and *CDKNIC* ex-  
226 pression increased with aging in cycling Hu-MuSCs and muscle progenitor cells. In contrast,  
227 *MYOD1* and *MYOG* levels decreased with aging in those two clusters as well as in the myoblast  
228 cluster. *CDKN2A* transcription levels also increased in myoblasts upon aging while *CDKNIC*  
229 levels decreased in the myoblast cluster (**Figure 4C**).

230 Overall, these analyses provide new insights into transcriptomic modulations of more differenti-  
231 ated human muscle stem cells and muscle progenitors during aging summarized by  
232 similar age-related GO term enrichment to Hu-MuSCs.

233 **DISCUSSION:**

234 In this extension of our prior work we performed extended transcriptomic analyses of isolated  
235 human muscle stem cells across a range of adult ages. We found that satellite cell aging is char-  
236 acterized by a global decrease in transcriptional heterogeneity. At the single gene level, new and  
237 previously described transcriptional age-related changes in human satellite cells were identified.

238 The addition of new samples coupled with more complex computational analyses of our  
239 single cell RNA sequencing data allowed us to further understand the cellular heterogeneity of  
240 human satellite cells. While aging was not associated with the appearance or disappearance of  
241 age-specific clusters, we found that the cell distribution among the different clusters was altered.  
242 A loss of cellular heterogeneity during mouse muscle aging has been shown previously,  
243 Chakkalakal et al. found a decrease of labeling retaining-SCs (bone fide stem cells) while com-  
244 mitted progenitors (non-labeling retaining-SCs) were preserved in aged mice (Chakkalakal et al.,  
245 2012). This suggests that certain subpopulations of Hu-MuSCs are retained with aging while  
246 others are reduced or partially lost. Importantly, this loss of heterogeneity was associated with a  
247 decline in transplantation potential of aged SCs (Chakkalakal et al., 2012). These prior studies  
248 together with this study suggest that a shift in satellite cell subpopulation representation may be  
249 responsible for impaired muscle regeneration in the aging population.

250 We found (1) the distribution of cells among the various human clusters we have charac-  
251 terized changes during aging and (2) genes including *CAVI*, *CXCL14*, *FNI* and *GPX3* that can  
252 explain this differential cell distribution. Our analysis highlighted gene-defining clusters that are  
253 significantly altered by aging. For example, we found that *CAVI*, a marker of a high transplanta-  
254 tion potential Hu-MuSC subpopulation (Barruet et al., 2020), decreases with age. We (Barruet et  
255 al., 2020) and others (Baker & Tuan, 2013) have previously described that *CAVI* is expressed in

256 quiescent satellite cells with increased engraftment properties, although its functional role in ag-  
257 ing satellite cells remains unknown. Indeed, *CAVI* in aging is not well understood as opposing  
258 finding a have been described in several tissues and studies (Gurley, Standifer, & Hargis, 2021;  
259 Ha et al., 2021; Head et al., 2010; Kruglikov, Zhang, & Scherer, 2019; Wicher, Prakash, &  
260 Pabelick, 2019). Further functional studies in human SCs are necessary to determine the precise  
261 role of *CAVI* in aging and future transplantation studies will help determine if diminishment of  
262 this satellite cell subpopulation is responsible for decreased satellite cell function in aging.

263 *CXCL14*, transcripts of which we found increased in aging, has been shown to prevent  
264 cell cycle withdrawal and to be a negative regulator of myoblast differentiation. Experimental  
265 *CXCL14* reduction ameliorates regenerative defects in aging mouse muscle (Waldemer-Streyer  
266 et al., 2017). We also found an increase of *GPX3* expression in aged Hu-MuSCs. *GPX3* (gluta-  
267 thione peroxidase 3), a retinoid-responsive gene that mediates the antioxidant effects of retinoic  
268 acid in human myoblasts, may be important in muscle stem cell survival (El Haddad et al.,  
269 2012). Therefore, our observed increase in *CXCL14*<sup>+</sup> and *GPX3*<sup>+</sup> Hu-MuSCs could be related to  
270 regenerative decline of aged human muscles.

271 Our in-depth computational analyses of human samples also corroborated other trends  
272 previously described in age-related mouse studies, notably a decrease in *ITGB1* and *SPRY1* ex-  
273 pression in aging. Levels of *ITGB1* and FAK (Focal Adhesion Kinase) were lower in aged satel-  
274 lite cells leading to decreased cell adhesion and increased cell death (Lukjanenko et al., 2016;  
275 Rozo et al., 2016). In addition to a decrease of *ITGB1* and FAK, our analyses also reveal a de-  
276 crease in ECM such as fibronectin and collagen associated genes. While extensive work has been  
277 done on ECM remodeling of the satellite cell's niche during aging (Evano & Tajbakhsh, 2018),  
278 there is a lack of data describing the effect of aging on ECM components produced by satellite

279 cells. Nevertheless, fibronectin and collagens produced by satellite cells are critical for the  
280 maintenance of their quiescence (Baghdadi et al., 2018; Bentzinger et al., 2013). Our analyses  
281 suggest that aging may induce a decrease in ECM components expression by Hu-MuSCs which  
282 may have a role in ECM remodeling found in aging muscles (Schüler et al., 2021).

283       SPRY1, a regulator of satellite cell return to quiescence (Shea et al., 2010) and detected  
284 in a subset of Hu-MuSCs in our previous (Barruet et al., 2020) and present studies, also decreases  
285 in aged SCs. Comparable results were found in mice, where age-associated methylation suppression  
286 of SPRY1 leads to loss of the reserve stem cell pool (Bigot et al., 2015) while SPRY1  
287 over-expression in aged satellite cells in vivo preserves the SC pool (Chakkalakal et al., 2012).  
288 Our findings add additional evidence supporting the concept that the high expressing *SPRY1*  
289 subset of SCs is critical for muscle regeneration during aging. We also found increased expression  
290 of other major drivers of ageing such as mTor pathway targets (e.i. *BCL2* and *VEGFA*) (Liu  
291 & Sabatini, 2020) being elevated in aged satellite cells. FOS was also found to be elevated in  
292 cluster 1 where most aged cells resided. Although, a recent study showed that Fos mRNA is a  
293 feature of freshly isolated satellite cells from uninjured muscle and that it marks a subset of satellite  
294 cells with enhanced regenerative ability (Almada et al., 2021), how FOS levels impact aging  
295 in human muscle stem cells still remains to be fully elucidated. Finally, our dataset also captured  
296 more differentiated muscle stem cells in which *CDKN2A* expression level was increased and  
297 *MYOD1* and *MYOG* levels were decreased with age. Indeed, increased level of *CDKN2A* has  
298 been described in geriatric human and mouse muscle stem cells to induce a loss of reversible  
299 quiescence, a pre-senescence state and result in failure to proliferate and differentiate (Sousa-  
300 Victor et al., 2014). Altogether, with a limited number of samples, our human satellite cell transcriptomic  
301 study was able to validate age-related mouse findings, confirm the potential role of

302 age-related pathways in Hu-MuSCs during aging, and identify changes in satellite cell distribu-  
303 tion among subpopulations.

304 Our RNA velocity analysis identified additional genes with age-specific differential ve-  
305 locity which explained the vector field of the different Hu-MuSCs age groups. While some of  
306 those will need further experimental investigation to understand their mechanism of action dur-  
307 ing aging (e.g *CDKN1C*, *DIO2*, *KLF6*, *NPTX2*, *MAP1B*), other genes, for which rodent experi-  
308 ments have been carried out in homeostasis, may explain the loss of satellite cell stemness and  
309 self-renewal such as *GREM1* and *EDN3*. *GREM1* velocity was associated with aged Hu-MuSCs.  
310 A BMP antagonist, *GREM1* would be expected to induce a decrease in satellite cell number  
311 (Borok et al., 2020) possibly by acting as a negative regulator of satellite cell self-renewal.  
312 Therefore *GREM1* could account for the loss of self-renewal and reduced number of satellite  
313 cells in aged human muscle. Separately, we found that *EDN3* explains the vector field of young  
314 Hu-MuSCs. *EDN3* is expressed in quiescent mouse satellite cells (Fukada et al., 2007) and is  
315 down-regulated as they become activated (Machado et al., 2017; van Velthoven, de Morree,  
316 Egner, Brett, & Rando, 2017) suggesting that *EDN3* could play a functional role and/or be a new  
317 marker for the loss of quiescence with aging.

318 This study is the first report of single cell transcriptomes of human satellite cells at vari-  
319 ous stages of aging. The possibility exists that our representation of aging human satellite cell  
320 transcriptomes is incomplete with a limited number of samples. However, since we were able to  
321 confirm previous mouse observations, it is likely that this study does contain a faithful and ade-  
322 quate sampling of human muscles to describe the major alterations of the transcriptomic land-  
323 scape in aging. In situ validations and functional studies will further elucidate the roles of the  
324 different genes identified here.



## 325 **MATERIALS AND METHODS:**

| Key Resources Table                |                             |                                                                                                                             |             |                        |
|------------------------------------|-----------------------------|-----------------------------------------------------------------------------------------------------------------------------|-------------|------------------------|
| Reagent type (species) or resource | Designation                 | Source or reference                                                                                                         | Identifiers | Additional information |
| software, algorithm                | Kallisto/loompy 3.0 package | <a href="https://linnarssonlab.org/loompy/kallisto/index.html">https://linnarssonlab.org/loompy/kallisto/index.html</a>     | SCR_016666  |                        |
| software, algorithm                | Scanpy version 1.9          | <a href="https://scanpy.readthedocs.io/en/latest/tutorials.html">https://scanpy.readthedocs.io/en/latest/tutorials.html</a> | SCR_018139  |                        |
| software, algorithm                | scVelo v0.2.4               | <a href="https://scvelo.readthedocs.io">https://scvelo.readthedocs.io</a>                                                   | SCR_018168  |                        |

326

### 327 ***Human Specimen Procurement and Hu-MuSCs isolation***

328 This study was conducted under the approval of the Institutional Review Board at The University  
329 of California San Francisco (UCSF). Biopsies were obtained from individuals undergoing sur-  
330 gery at UCSF. Written informed consent was obtained from all subjects. All types of muscle  
331 used for each experiment are listed in **Figure 1-Source Data 1**. Additional  
332 CXCR4+/CD29+/CD65+ Hu-MuSC samples were isolated as described in (Barruet et al., 2020;  
333 Garcia et al., 2018; Garcia, Tamaki, Xu, & Pomerantz, 2017; X. Xu et al., 2015).

334

### 335 ***Single cell RNA Sequencing and Analysis***

336 Single cell RNA sequencing and gene core matrices retrieval of additional samples were per-  
337 formed as described in (Barruet et al., 2020). Gene-barcoded matrices were analyzed with the  
338 Python package Scanpy version 1.9 (F. Alexander Wolf et al., 2018). For each sample, cells with  
339 fewer than 500 genes, greater than 7000 genes and genes expressed in fewer than 5 cells were

340 not included in the downstream analyses. Cells with more than 15% mitochondrial counts were  
341 filtered out. Each sample was first merged into its own age group with batch balanced k nearest  
342 neighbor (BBKNN) algorithm (Polański et al., 2019) to remove potential technical variation be-  
343 tween samples. A resolution of 0.5 was used for all subset age group. Cluster were annotated us-  
344 ing known markers found in the literature combined with differentially expressed genes (Wil-  
345 coxon test, function `sc.tl.rank_genes_groups`). Since after filtering the adult group contained  
346 66,905 cells, and the young and aged group contained 11,502 cells and 9,407 cells respectively,  
347 to avoid confounding factors due to discrepancy in cell number among the three age groups, we  
348 downsampled the adult cell group to 11,000 cells using the `sc.pp.subsample` function. Following  
349 this, the ‘adult’ and ‘aged’ datasets were integrated onto the annotated ‘young’ dataset using the  
350 Scanpy INGEST function `sc.tl.ingest`. Differential expression analysis was performed between  
351 the age groups using the same Wilcoxon statistical test, as implemented in Scanpy. Marker gene  
352 expression was visualized using either dot-plots, where the size of the dot reflects the percentage  
353 of cells expressing the gene and the color indicated the relative expression, or violin plots, with  
354 the width of the violin plot depicting the larger probability density of cells expressing each gene  
355 at the indicated expression levels.

356

### 357 *scVelo and PAGA trajectory analysis*

358 Count matrices (unspliced) and mature (spliced) abundances were generated for each sample  
359 from fastq files using Kallisto/loompy 3.0 package. scVelo v0.2.4 package implemented into  
360 Scanpy was used to perform RNA velocity analysis (Bergen et al., 2020). Datasets were pro-  
361 cessed using the recommended parameters as described in Scanpy scVelo implementation  
362 (Bergen et al., 2020). The age group samples were pre-processed using `scv.pp.filter` and

363 scv.pp.normalize followed by scv.pp.moments functions for detection of minimum number of  
364 counts, filtering and normalization. scv.tl.velocity and scv.tl.velocity\_graph functions were used  
365 to calculate and visualized gene specific velocities. Gene ranking for each age group resulting  
366 from differential velocity t-test was perform using the scv.tl.rank\_velocity\_genes. Scanpy im-  
367 plemented partition-based graph abstraction (PAGA) functions (scv.tl.paga and scv.pl.paga) was  
368 used to assess the data topology with weighted edges corresponding to the connectivity between  
369 two clusters. Default parameters were used (F. A. Wolf et al., 2019).

370

### 371 *Gene Ontology analysis*

372 Differentially expressed genes, p-values and fold changes were used as input to generate GO-  
373 term enrichment with the clusterProfiler package in R. Thresholds were set p-value <0.05 and  
374 fold change >1 for the GO-term analysis.

375

### 376 *Data and materials availability*

377 Single cell gene expression fastq files and filtered matrices have been deposited (GSE196554).

378 Detailed scripts can be found here, [https://github.com/EmilieB12/Aging\\_Hu-MuSCs](https://github.com/EmilieB12/Aging_Hu-MuSCs).

379

### 380 **ACKNOWLEDGEMENTS:**

381 This work was supported by NIH R01AR072638-03 to JHP. The authors would like to thank all  
382 the organ and tissue donors and their families for their generous donation.

383 **FIGURE LEGENDS:**

384

385 **Figure 1: Distribution of Hu-MuSC subpopulations during adult aging.** (A) Workflow of the  
386 analysis. (B) UMAP of merged age groups using INGEST with labeled clusters. (C) Violin plots  
387 displaying the expression of myogenic, cycling, stemness and cluster marker genes for each cluster.  
388 (D) UMAP density plot for each age group (Young, Adult, Aged). (E) Proportion plot of  
389 cells assigned to each age group according to each cluster. (F) RNA velocities projected onto the  
390 UMAP clusters for each age group. (G) PAGA analysis for the different age group. Weighted  
391 edges correspond to the connectivity between two clusters.

392

393 **Figure 2: Gene expression and velocity analyses of Hu-MuSCs of young, adult and aged**  
394 **groups.** (A) Schematic of the sub-clustering. Only Hu-MuSCs were analyzed. (B) UMAP of  
395 merged age groups for only the human muscle stem cells (cluster 0-3, 5-7 and 10). (C) Dot plot  
396 displaying the top 3 genes differentially expressed for each age group in the whole Hu-MuSCs  
397 subset. (D) Violin plots of the expression of genes altered with aging. (E) Expression of relevant  
398 genes that inferred age-specific differential velocity. (F) Velocity of genes from (E).

399

400 **Figure 3: Gene ontology enrichment upon aging in Hu-MuSCs.** Bar plots of gene ontology  
401 analysis of differentially up- and down- regulated genes in Hu-MuSCs for each age group.

402

403 **Figure 4: Transcriptional analysis of progenitor and myoblast cells in the different age**  
404 **groups.** (A) UMAP of merged age groups for only muscle progenitors (cluster 4), cycling Hu-  
405 MuSCs (cluster 8) and Myoblasts (cluster 9). (B) Dot plot displaying the top 4 genes differential-  
406 ly expressed for each age group in cluster 4, 8 and 9. (C) Violin plots of the expression of genes  
407 altered with aging. (D) Summary schematic of how Hu-MuSCs transcriptome changes with ag-  
408 ing.

409  
410 **Figure 1-figure supplement 1: BBKNN and INGEST merging of sorted human muscle stem**  
411 **cells.** (A) As shown in Figure 1A, samples were first merged into their own age group. UMAP  
412 displaying clusters and samples for each age group. (B) Dot plots displaying the expression of  
413 myogenic, cycling, stemness and cluster marker genes for each cluster in each age group. (C)  
414 UMAP of the INGEST analysis displaying all 12 samples. (D) MAP of each age group and their  
415 distribution in clusters. (E) Proportion plot of cells assigned to each cluster for each age group.

416  
417 **Figure 2-figure supplement 1: Expression and velocity of relevant genes that inferred age-**  
418 **specific differential velocity.**

419  
420 **Figure 4-figure supplement 1: Cycling Hu-MuSCs GO term analysis upon aging.** Bar plots  
421 of gene ontology analysis of differentially up-regulated genes in the cycling Hu-MuSCs cluster  
422 (8) for each age group.

423

424 **Figure 4-figure supplement 2: Progenitor and myoblast cells GO term analysis upon aging.**

425 Bar plots of gene ontology analysis of differentially up-regulated genes in the muscle progenitor  
426 cluster (4), cycling Hu-MuSCs cluster (8) and Myoblasts cluster (9) for each age group.

427

428 **ADDITIONAL FILES:**

429

430 **Figure 1-Source Data 1: Demographics and sample characteristics collected and used for**  
431 **downstream analysis.**

432

433 **Figure 2-Source Data 1: Gene ranking for each age group resulting from differential veloci-**  
434 **ty t-test.**

435 **REFERENCES:**

- 436 Almada, A. E., Horwitz, N., Price, F. D., Gonzalez, A. E., Ko, M., Bolukbasi, O. V., . . . Wagers,  
437 A. J. (2021). FOS licenses early events in stem cell activation driving skeletal muscle  
438 regeneration. *Cell Rep*, 34(4), 108656. doi:10.1016/j.celrep.2020.108656
- 439 Angelidis, I., Simon, L. M., Fernandez, I. E., Strunz, M., Mayr, C. H., Greiffo, F. R., . . . Strom,  
440 T.-M. (2019). An atlas of the aging lung mapped by single cell transcriptomics and deep  
441 tissue proteomics. *Nature communications*, 10(1), 1-17.
- 442 Arpke, R. W., Shams, A. S., Collins, B. C., Larson, A. A., Lu, N., Lowe, D. A., & Kyba, M.  
443 (2021). Preservation of satellite cell number and regenerative potential with age reveals  
444 locomotory muscle bias. *Skeletal Muscle*, 11(1), 22. doi:10.1186/s13395-021-00277-2
- 445 Baghdadi, M. B., Castel, D., Machado, L., Fukada, S.-i., Birk, D. E., Relaix, F., . . . Mourikis, P.  
446 (2018). Reciprocal signalling by Notch–Collagen V–CALCR retains muscle stem cells in  
447 their niche. *Nature*, 557(7707), 714-718. doi:10.1038/s41586-018-0144-9
- 448 Baker, N., & Tuan, R. S. (2013). The less-often-traveled surface of stem cells: caveolin-1 and  
449 caveolae in stem cells, tissue repair and regeneration. *Stem Cell Res Ther*, 4(4), 90.  
450 doi:10.1186/scri276
- 451 Barruet, E., Garcia, S. M., Striedinger, K., Wu, J., Lee, S., Byrnes, L., . . . Pomerantz, J. H.  
452 (2020). Functionally heterogeneous human satellite cells identified by single cell RNA  
453 sequencing. *Elife*, 9. doi:10.7554/eLife.51576
- 454 Bentzinger, C. F., Wang, Y. X., von Maltzahn, J., Soleimani, V. D., Yin, H., & Rudnicki, M. A.  
455 (2013). Fibronectin regulates Wnt7a signaling and satellite cell expansion. *Cell Stem*  
456 *Cell*, 12(1), 75-87. doi:10.1016/j.stem.2012.09.015
- 457 Bergen, V., Lange, M., Peidli, S., Wolf, F. A., & Theis, F. J. (2020). Generalizing RNA velocity to  
458 transient cell states through dynamical modeling. *Nature Biotechnology*, 38(12), 1408-  
459 1414. doi:10.1038/s41587-020-0591-3
- 460 Bigot, A., Duddy, W. J., Ouandaogo, Z. G., Negroni, E., Mariot, V., Ghimbovschi, S., . . .  
461 Duguez, S. (2015). Age-Associated Methylation Suppresses SPRY1, Leading to a  
462 Failure of Re-quiescence and Loss of the Reserve Stem Cell Pool in Elderly Muscle. *Cell*  
463 *Reports*, 13(6), 1172-1182. doi:<https://doi.org/10.1016/j.celrep.2015.09.067>
- 464 Bik-Multanowski, M., Pietrzyk, J. J., & Midro, A. (2015). MTRNR2L12: A Candidate Blood  
465 Marker of Early Alzheimer's Disease-Like Dementia in Adults with Down Syndrome. *J*  
466 *Alzheimers Dis*, 46(1), 145-150. doi:10.3233/jad-143030
- 467 Borok, M. J., Mademtoglou, D., & Relaix, F. (2020). Bu-M-P-ing Iron: How BMP Signaling  
468 Regulates Muscle Growth and Regeneration. *J Dev Biol*, 8(1). doi:10.3390/jdb8010004
- 469 Brack, A. S., & Muñoz-Cánoves, P. (2016). The ins and outs of muscle stem cell aging. *Skeletal*  
470 *Muscle*, 6(1), 1. doi:10.1186/s13395-016-0072-z
- 471 Buroker, N. E. (2014). Regulatory SNPs and transcriptional factor binding sites in ADRBK1,  
472 AKT3, ATF3, DIO2, TBXA2R and VEGFA. *Transcription*, 5(4), e964559.  
473 doi:10.4161/21541264.2014.964559
- 474 Chakkalakal, J. V., Jones, K. M., Basson, M. A., & Brack, A. S. (2012). The aged niche disrupts  
475 muscle stem cell quiescence. *Nature*, 490(7420), 355-360. doi:10.1038/nature11438
- 476 Chang, N. C., & Rudnicki, M. A. (2014). Satellite cells: the architects of skeletal muscle. *Curr*  
477 *Top Dev Biol*, 107, 161-181. doi:10.1016/b978-0-12-416022-4.00006-8
- 478 Charville, G. W., Cheung, T. H., Yoo, B., Santos, P. J., Lee, G. K., Shrager, J. B., & Rando, T.  
479 A. (2015). Ex Vivo Expansion and In Vivo Self-Renewal of Human Muscle Stem Cells.  
480 *Stem Cell Reports*, 5(4), 621-632. doi:10.1016/j.stemcr.2015.08.004
- 481 Conboy, I. M., Conboy, M. J., Smythe, G. M., & Rando, T. A. (2003). Notch-mediated restoration  
482 of regenerative potential to aged muscle. *Science*, 302(5650), 1575-1577.  
483 doi:10.1126/science.1087573



- 484 Consortium, T. M. (2020). A single cell transcriptomic atlas characterizes aging tissues in the  
485 mouse. *Nature*, 583(7817), 590.
- 486 Curtis, E., Litwic, A., Cooper, C., & Dennison, E. (2015). Determinants of Muscle and Bone  
487 Aging. *J Cell Physiol*, 230(11), 2618-2625. doi:10.1002/jcp.25001
- 488 De Santis, R., Etoc, F., Rosado-Olivieri, E. A., & Brivanlou, A. H. (2021). Self-organization of  
489 human dorsal-ventral forebrain structures by light induced SHH. *Nature communications*,  
490 12(1), 6768. doi:10.1038/s41467-021-26881-w
- 491 Ding, C., Fan, X., & Wu, G. (2017). Peroxiredoxin 1 - an antioxidant enzyme in cancer. *J Cell*  
492 *Mol Med*, 21(1), 193-202. doi:10.1111/jcmm.12955
- 493 Distefano, G., & Goodpaster, B. H. (2018). Effects of Exercise and Aging on Skeletal Muscle.  
494 *Cold Spring Harb Perspect Med*, 8(3). doi:10.1101/cshperspect.a029785
- 495 El Haddad, M., Jean, E., Turki, A., Hugon, G., Vernus, B., Bonniou, A., . . . Carnac, G. (2012).  
496 Glutathione peroxidase 3, a new retinoid target gene, is crucial for human skeletal  
497 muscle precursor cell survival. *Journal of Cell Science*, 125(24), 6147-6156.  
498 doi:10.1242/jcs.115220
- 499 Ermolaeva, M., Neri, F., Ori, A., & Rudolph, K. L. (2018). Cellular and epigenetic drivers of stem  
500 cell ageing. *Nature Reviews Molecular Cell Biology*, 19(9), 594-610.  
501 doi:10.1038/s41580-018-0020-3
- 502 Evano, B., & Tajbakhsh, S. (2018). Skeletal muscle stem cells in comfort and stress. *npj*  
503 *Regenerative Medicine*, 3(1), 24. doi:10.1038/s41536-018-0062-3
- 504 Fukada, S., Uezumi, A., Ikemoto, M., Masuda, S., Segawa, M., Tanimura, N., . . . Takeda, S.  
505 (2007). Molecular signature of quiescent satellite cells in adult skeletal muscle. *Stem*  
506 *Cells*, 25(10), 2448-2459. doi:10.1634/stemcells.2007-0019
- 507 Garcia, S. M., Tamaki, S., Lee, S., Wong, A., Jose, A., Dreux, J., . . . Pomerantz, J. H. (2018).  
508 High-Yield Purification, Preservation, and Serial Transplantation of Human Satellite  
509 Cells. *Stem Cell Reports*, 10(3), 1160-1174. doi:10.1016/j.stemcr.2018.01.022
- 510 Garcia, S. M., Tamaki, S., Xu, X., & Pomerantz, J. H. (2017). Human Satellite Cell Isolation and  
511 Xenotransplantation. *Methods Mol Biol*, 1668, 105-123. doi:10.1007/978-1-4939-7283-  
512 8\_8
- 513 García-Prat, L., Martínez-Vicente, M., Perdiguero, E., Ortet, L., Rodríguez-Ubreva, J., Rebollo,  
514 E., . . . Serrano, A. L. (2016). Autophagy maintains stemness by preventing senescence.  
515 *Nature*, 529(7584), 37-42.
- 516 Gurley, J., Standifer, N., & Hargis, E. A. (2021). Progressive loss of retinal arteriolar smooth  
517 muscle cells (SMCs) with aging and caveolin-1 (Cav1) depletion: Assessing the  
518 importance of endothelial cell (EC)-Cav1 in retinal SMC maintenance. *Investigative*  
519 *Ophthalmology & Visual Science*, 62(8), 2728-2728.
- 520 Ha, T.-Y., Choi, Y. R., Noh, H. R., Cha, S.-H., Kim, J.-B., & Park, S. M. (2021). Age-related  
521 increase in caveolin-1 expression facilitates cell-to-cell transmission of  $\alpha$ -synuclein in  
522 neurons. *Molecular Brain*, 14(1), 122. doi:10.1186/s13041-021-00834-2
- 523 Halpain, S., & Dehmelt, L. (2006). The MAP1 family of microtubule-associated proteins.  
524 *Genome Biol*, 7(6), 224. doi:10.1186/gb-2006-7-6-224
- 525 Head, B. P., Peart, J. N., Panneerselvam, M., Yokoyama, T., Pearn, M. L., Niesman, I. R., . . .  
526 Patel, H. H. (2010). Loss of Caveolin-1 Accelerates Neurodegeneration and Aging.  
527 *PLOS ONE*, 5(12), e15697. doi:10.1371/journal.pone.0015697
- 528 Jørgensen, L. H., Jepsen, P. L., Boysen, A., Dalgaard, L. B., Hvid, L. G., Ørtenblad, N., . . .  
529 Schrøder, H. D. (2017). SPARC Interacts with Actin in Skeletal Muscle in Vitro and  
530 in Vivo. *Am J Pathol*, 187(2), 457-474. doi:10.1016/j.ajpath.2016.10.013
- 531 Karbiener, M., Glantschnig, C., Pisani, D. F., Laurencikienė, J., Dahlman, I., Herzig, S., . . .  
532 Scheideler, M. (2015). Mesoderm-specific transcript (MEST) is a negative regulator of  
533 human adipocyte differentiation. *International Journal of Obesity*, 39(12), 1733-1741.  
534 doi:10.1038/ijo.2015.121



- 535 Kawanabe, Y., & Nauli, S. M. (2011). Endothelin. *Cell Mol Life Sci*, 68(2), 195-203.  
536 doi:10.1007/s00018-010-0518-0
- 537 Kimmel, J. C., Penland, L., Rubinstein, N. D., Hendrickson, D. G., Kelley, D. R., & Rosenthal, A.  
538 Z. (2019). Murine single-cell RNA-seq reveals cell-identity-and tissue-specific trajectories  
539 of aging. *Genome research*, 29(12), 2088-2103.
- 540 Kimmel, J. C., Yi, N., Roy, M., Hendrickson, D. G., & Kelley, D. R. (2021). Differentiation reveals  
541 latent features of aging and an energy barrier in murine myogenesis. *Cell Reports*, 35(4),  
542 109046. doi:<https://doi.org/10.1016/j.celrep.2021.109046>
- 543 Kowalczyk, M. S., Tirosh, I., Heckl, D., Rao, T. N., Dixit, A., Haas, B. J., . . . Regev, A. (2015).  
544 Single-cell RNA-seq reveals changes in cell cycle and differentiation programs upon  
545 aging of hematopoietic stem cells. *Genome research*, 25(12), 1860-1872.
- 546 Kruglikov, I. L., Zhang, Z., & Scherer, P. E. (2019). Caveolin-1 in skin aging – From innocent  
547 bystander to major contributor. *Ageing Research Reviews*, 55, 100959.  
548 doi:<https://doi.org/10.1016/j.arr.2019.100959>
- 549 La Manno, G., Soldatov, R., Zeisel, A., Braun, E., Hochgerner, H., Petukhov, V., . . .  
550 Kharchenko, P. V. (2018). RNA velocity of single cells. *Nature*, 560(7719), 494-498.  
551 doi:10.1038/s41586-018-0414-6
- 552 Lee, D., Takayama, S., & Goldberg, A. L. (2018). ZFAND5/ZNF216 is an activator of the 26S  
553 proteasome that stimulates overall protein degradation. *Proc Natl Acad Sci U S A*,  
554 115(41), E9550-e9559. doi:10.1073/pnas.1809934115
- 555 Liu, G. Y., & Sabatini, D. M. (2020). mTOR at the nexus of nutrition, growth, ageing and  
556 disease. *Nature Reviews Molecular Cell Biology*, 21(4), 183-203. doi:10.1038/s41580-  
557 019-0199-y
- 558 Liu, J., Li, J., Wang, K., Liu, H., Sun, J., Zhao, X., . . . Yang, A. (2021). Aberrantly high activation  
559 of a FoxM1–STMN1 axis contributes to progression and tumorigenesis in FoxM1-driven  
560 cancers. *Signal Transduction and Targeted Therapy*, 6(1), 42. doi:10.1038/s41392-020-  
561 00396-0
- 562 Liu, J., Song, X., Kuang, F., Zhang, Q., Xie, Y., Kang, R., . . . Tang, D. (2021). NUPR1 is a  
563 critical repressor of ferroptosis. *Nat Commun*, 12(1), 647. doi:10.1038/s41467-021-  
564 20904-2
- 565 Lukjanenko, L., Jung, M. J., Hegde, N., Perruisseau-Carrier, C., Migliavacca, E., Rozo, M., . . .  
566 Bentzinger, C. F. (2016). Loss of fibronectin from the aged stem cell niche affects the  
567 regenerative capacity of skeletal muscle in mice. *Nature Medicine*, 22(8), 897-905.  
568 doi:10.1038/nm.4126
- 569 Machado, L., Esteves de Lima, J., Fabre, O., Proux, C., Legendre, R., Szegedi, A., . . . Mourikis,  
570 P. (2017). In Situ Fixation Redefines Quiescence and Early Activation of Skeletal Muscle  
571 Stem Cells. *Cell Rep*, 21(7), 1982-1993. doi:10.1016/j.celrep.2017.10.080
- 572 Mademtzoglou, D., Asakura, Y., Borok, M. J., Alonso-Martin, S., Mourikis, P., Kodaka, Y., . . .  
573 Relaix, F. (2018). Cellular localization of the cell cycle inhibitor Cdkn1c controls growth  
574 arrest of adult skeletal muscle stem cells. *Elife*, 7. doi:10.7554/eLife.33337
- 575 Martinez, J. R., Dhawan, A., & Farach-Carson, M. C. (2018). Modular Proteoglycan  
576 Perlecan/HSPG2: Mutations, Phenotypes, and Functions. *Genes (Basel)*, 9(11).  
577 doi:10.3390/genes9110556
- 578 Marty, I., & Fauré, J. (2016). Excitation-Contraction Coupling Alterations in Myopathies. *J*  
579 *Neuromuscul Dis*, 3(4), 443-453. doi:10.3233/jnd-160172
- 580 Polański, K., Young, M. D., Miao, Z., Meyer, K. B., Teichmann, S. A., & Park, J.-E. (2019).  
581 BBKNN: fast batch alignment of single cell transcriptomes. *Bioinformatics*, 36(3), 964-  
582 965. doi:10.1093/bioinformatics/btz625
- 583 Rad, A., Altunoglu, U., Miller, R., Maroofian, R., James, K. N., Çağlayan, A. O., . . . Schmidts,  
584 M. (2019). MAB21L1 loss of function causes a syndromic neurodevelopmental disorder  
585 with distinctive cerebellar, ocular, craniofacial and

- 586 <em>g</em>enital features (COFG syndrome). *Journal of Medical Genetics*, 56(5), 332-  
587 339. doi:10.1136/jmedgenet-2018-105623
- 588 Rozo, M., Li, L., & Fan, C.-M. (2016). Targeting  $\beta$ 1-integrin signaling enhances regeneration in  
589 aged and dystrophic muscle in mice. *Nature Medicine*, 22(8), 889-896.  
590 doi:10.1038/nm.4116
- 591 Scaramozza, A., Park, D., Kollu, S., Beerman, I., Sun, X., Rossi, D. J., . . . Brack, A. S. (2019).  
592 Lineage Tracing Reveals a Subset of Reserve Muscle Stem Cells Capable of Clonal  
593 Expansion under Stress. *Cell Stem Cell*, 24(6), 944-957 e945.  
594 doi:10.1016/j.stem.2019.03.020
- 595 Schäfer, R., Zwyer, M., Knauf, U., Mundegar, R. R., & Wernig, A. (2005). The ontogeny of  
596 soleus muscles in mdx and wild type mice. *Neuromuscul Disord*, 15(1), 57-64.  
597 doi:10.1016/j.nmd.2004.09.011
- 598 Schüler, S. C., Kirkpatrick, J. M., Schmidt, M., Santinha, D., Koch, P., Di Sanzo, S., . . . von  
599 Maltzahn, J. (2021). Extensive remodeling of the extracellular matrix during aging  
600 contributes to age-dependent impairments of muscle stem cell functionality. *Cell Rep*,  
601 35(10), 109223. doi:10.1016/j.celrep.2021.109223
- 602 Shea, K. L., Xiang, W., LaPorta, V. S., Licht, J. D., Keller, C., Basson, M. A., & Brack, A. S.  
603 (2010). Sprouty1 regulates reversible quiescence of a self-renewing adult muscle stem  
604 cell pool during regeneration. *Cell Stem Cell*, 6(2), 117-129.  
605 doi:10.1016/j.stem.2009.12.015
- 606 Shi, N., Guo, X., & Chen, S. Y. (2014). Olfactomedin 2, a novel regulator for transforming  
607 growth factor- $\beta$ -induced smooth muscle differentiation of human embryonic stem cell-  
608 derived mesenchymal cells. *Mol Biol Cell*, 25(25), 4106-4114. doi:10.1091/mbc.E14-08-  
609 1255
- 610 Snijders, T., Nederveen, J. P., McKay, B. R., Joannisse, S., Verdijk, L. B., van Loon, L. J. C., &  
611 Parise, G. (2015). Satellite cells in human skeletal muscle plasticity. *Frontiers in*  
612 *Physiology*, 6. doi:10.3389/fphys.2015.00283
- 613 Soderblom, C., Stadler, J., Jupille, H., Blackstone, C., Shupliakov, O., & Hanna, M. C. (2010).  
614 Targeted disruption of the Mast syndrome gene SPG21 in mice impairs hind limb  
615 function and alters axon branching in cultured cortical neurons. *Neurogenetics*, 11(4),  
616 369-378. doi:10.1007/s10048-010-0252-7
- 617 Sousa-Victor, P., Gutarra, S., García-Prat, L., Rodriguez-Ubreva, J., Ortet, L., Ruiz-Bonilla, V., .  
618 . . Muñoz-Cánoves, P. (2014). Geriatric muscle stem cells switch reversible quiescence  
619 into senescence. *Nature*, 506(7488), 316-321. doi:10.1038/nature13013
- 620 Stielow, B., Zhou, Y., Cao, Y., Simon, C., Pogoda, H.-M., Jiang, J., . . . Liefke, R. (2021). The  
621 SAM domain-containing protein 1 (SAMD1) acts as a repressive chromatin regulator at  
622 unmethylated CpG islands. *Science Advances*, 7(20), eabf2229.  
623 doi:doi:10.1126/sciadv.abf2229
- 624 Stuart, T., Butler, A., Hoffman, P., Hafemeister, C., Papalexi, E., Mauck, W. M., 3rd, . . . Satija,  
625 R. (2019). Comprehensive Integration of Single-Cell Data. *Cell*, 177(7), 1888-  
626 1902.e1821. doi:10.1016/j.cell.2019.05.031
- 627 Tetreault, M. P., Yang, Y., & Katz, J. P. (2013). Krüppel-like factors in cancer. *Nat Rev Cancer*,  
628 13(10), 701-713. doi:10.1038/nrc3582
- 629 van Velthoven, C. T. J., de Morree, A., Egner, I. M., Brett, J. O., & Rando, T. A. (2017).  
630 Transcriptional Profiling of Quiescent Muscle Stem Cells In Vivo. *Cell Rep*, 21(7), 1994-  
631 2004. doi:10.1016/j.celrep.2017.10.037
- 632 Varghese, V., Magnani, L., Harada-Shoji, N., Mauri, F., Szydlo, R. M., Yao, S., . . . Kenny, L. M.  
633 (2019). FOXM1 modulates 5-FU resistance in colorectal cancer through regulating  
634 TYMS expression. *Sci Rep*, 9(1), 1505. doi:10.1038/s41598-018-38017-0

- 635 Waldemer-Streyer, R. J., Reyes-Ordoñez, A., Kim, D., Zhang, R., Singh, N., & Chen, J. (2017).  
636 Cxcl14 depletion accelerates skeletal myogenesis by promoting cell cycle withdrawal.  
637 *npj Regenerative Medicine*, 2(1), 16017. doi:10.1038/npjregenmed.2016.17
- 638 Wang, Y., Liu, S., Yan, Y., Li, S., & Tong, H. (2019). SPARCL1 promotes C2C12 cell  
639 differentiation via BMP7-mediated BMP/TGF- $\beta$  cell signaling pathway. *Cell death &*  
640 *disease*, 10(11), 852. doi:10.1038/s41419-019-2049-4
- 641 Wang, Z., Wang, X., Zou, H., Dai, Z., Feng, S., Zhang, M., . . . Cheng, Q. (2020). The Basic  
642 Characteristics of the Pentraxin Family and Their Functions in Tumor Progression.  
643 *Frontiers in Immunology*, 11(1757). doi:10.3389/fimmu.2020.01757
- 644 Wicher, S. A., Prakash, Y. S., & Pabelick, C. M. (2019). Caveolae, caveolin-1 and lung diseases  
645 of aging. *Expert Rev Respir Med*, 13(3), 291-300. doi:10.1080/17476348.2019.1575733
- 646 Wolf, F. A., Angerer, P., & Theis, F. J. (2018). SCANPY: large-scale single-cell gene expression  
647 data analysis. *Genome Biology*, 19(1), 15. doi:10.1186/s13059-017-1382-0
- 648 Wolf, F. A., Hamey, F. K., Plass, M., Solana, J., Dahlin, J. S., Göttgens, B., . . . Theis, F. J.  
649 (2019). PAGA: graph abstraction reconciles clustering with trajectory inference through a  
650 topology preserving map of single cells. *Genome Biol*, 20(1), 59. doi:10.1186/s13059-  
651 019-1663-x
- 652 Wu, S. A., Kersten, S., & Qi, L. (2021). Lipoprotein Lipase and Its Regulators: An Unfolding  
653 Story. *Trends Endocrinol Metab*, 32(1), 48-61. doi:10.1016/j.tem.2020.11.005
- 654 Xu, Q. Q., Qin, L. T., Liang, S. W., Chen, P., Gu, J. H., Huang, Z. G., . . . Chen, J. B. (2020).  
655 The Expression and Potential Role of Tubulin Alpha 1b in Wilms' Tumor. *Biomed Res*  
656 *Int*, 2020, 9809347. doi:10.1155/2020/9809347
- 657 Xu, X., Wilschut, K. J., Kouklis, G., Tian, H., Hesse, R., Garland, C., . . . Pomerantz, J. H.  
658 (2015). Human Satellite Cell Transplantation and Regeneration from Diverse Skeletal  
659 Muscles. *Stem Cell Reports*, 5(3), 419-434. doi:10.1016/j.stemcr.2015.07.016
- 660

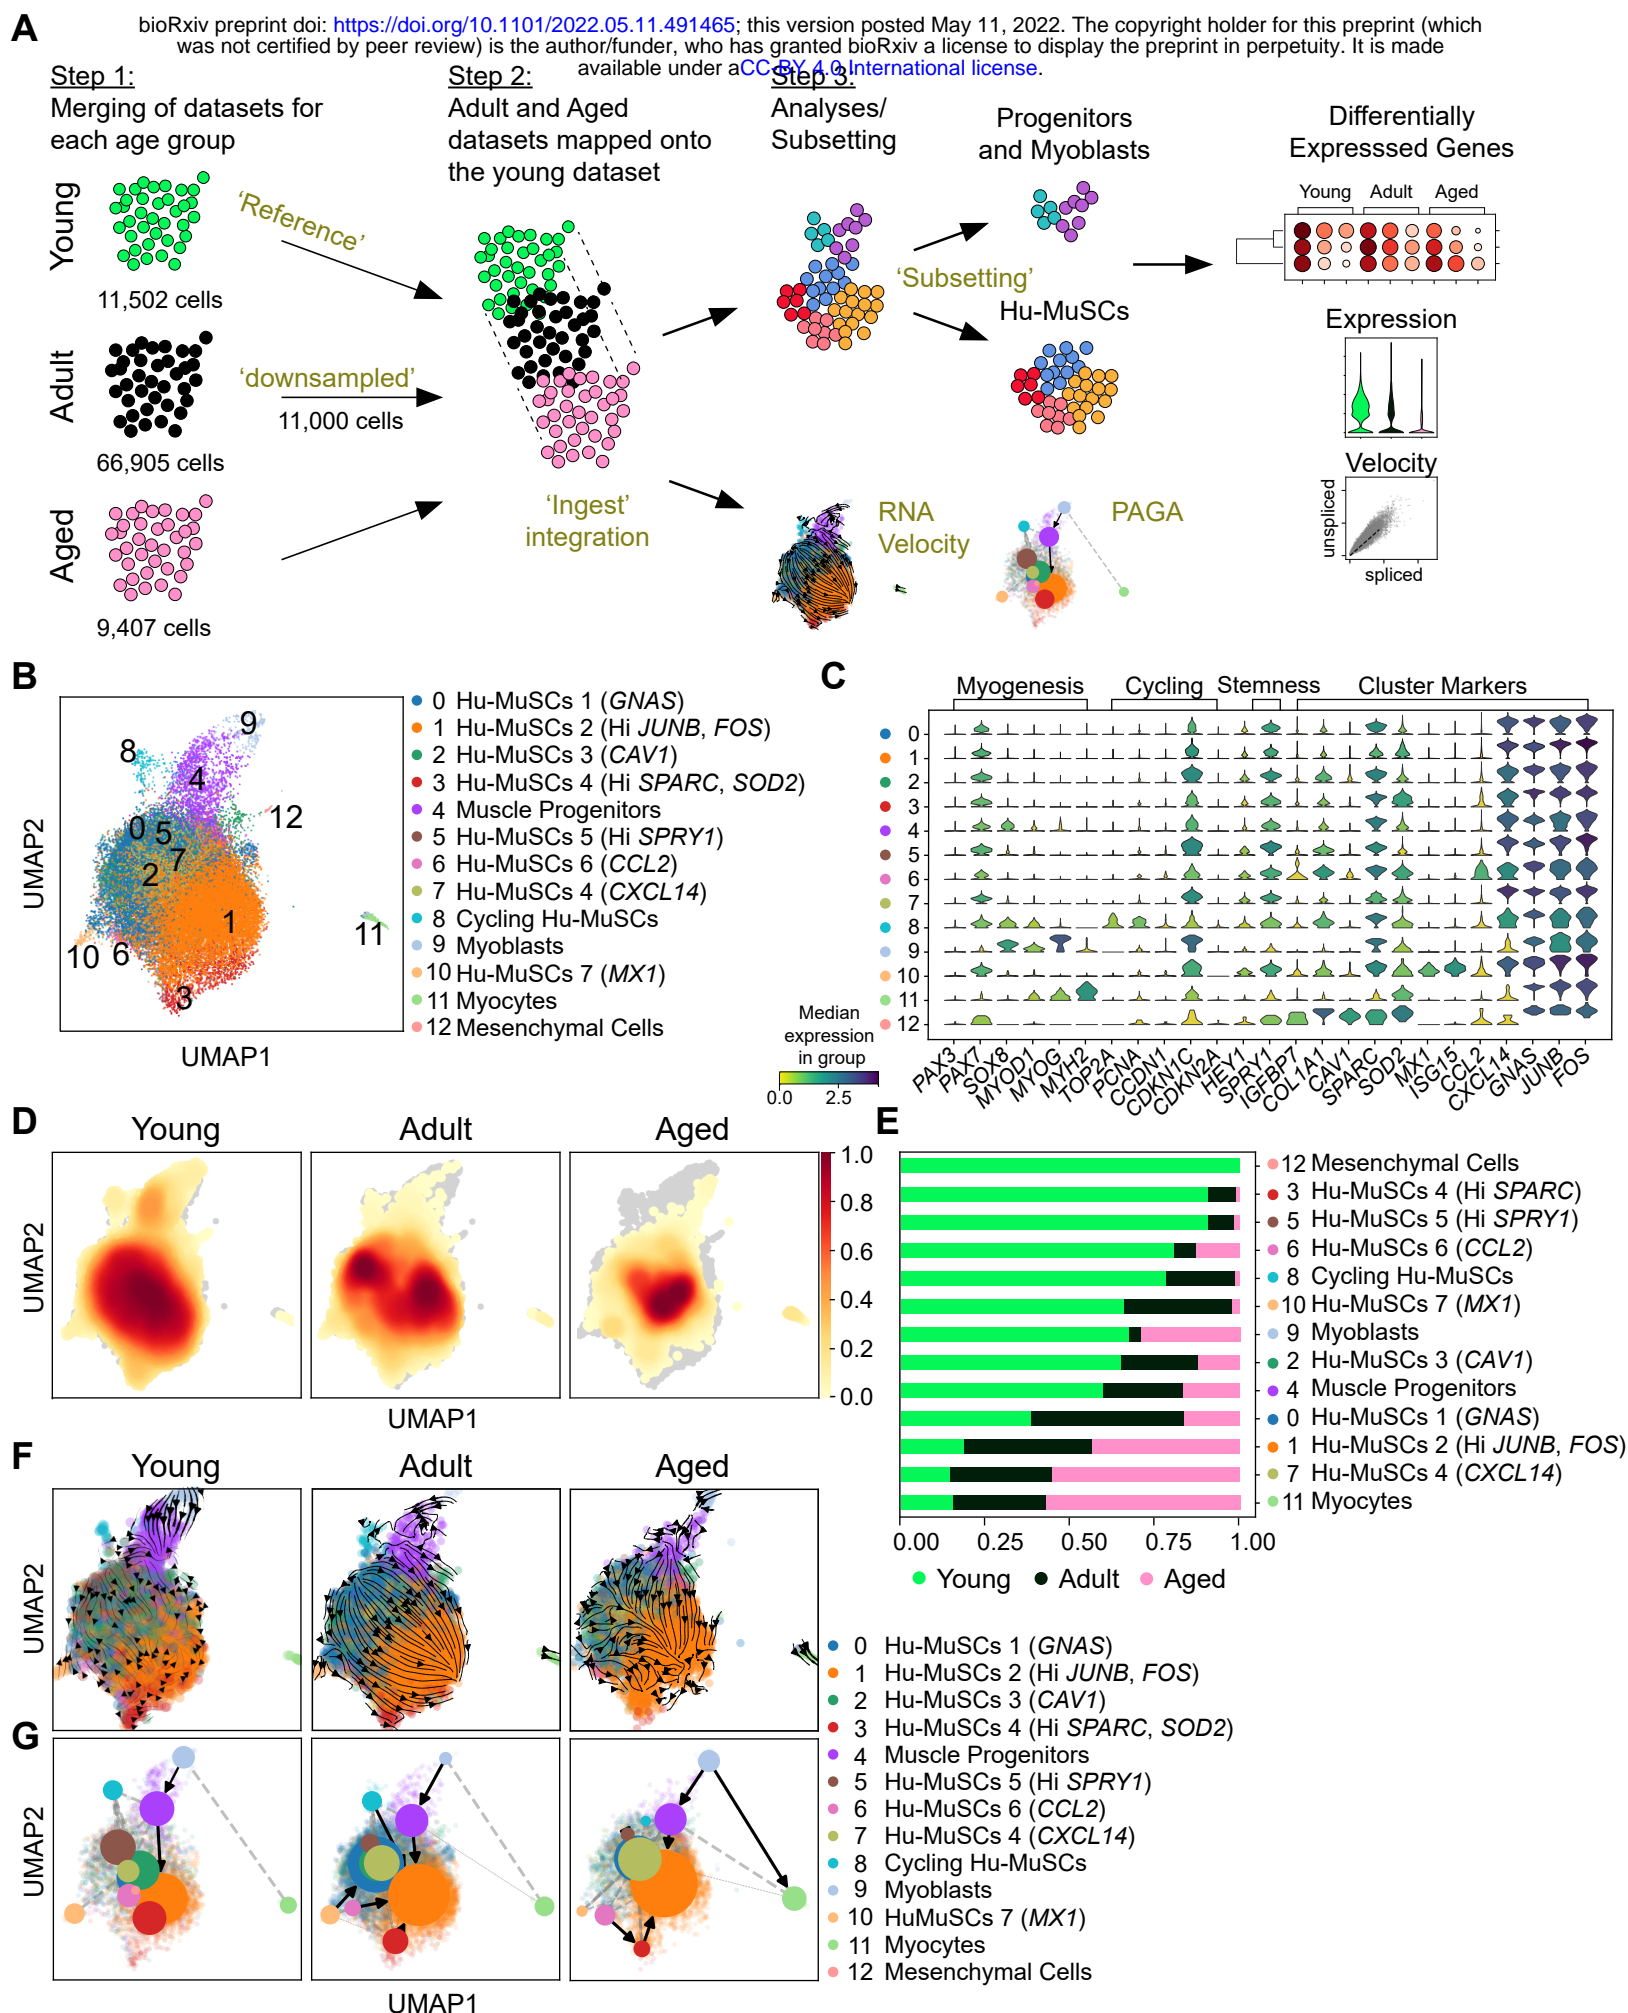

**Figure 1**



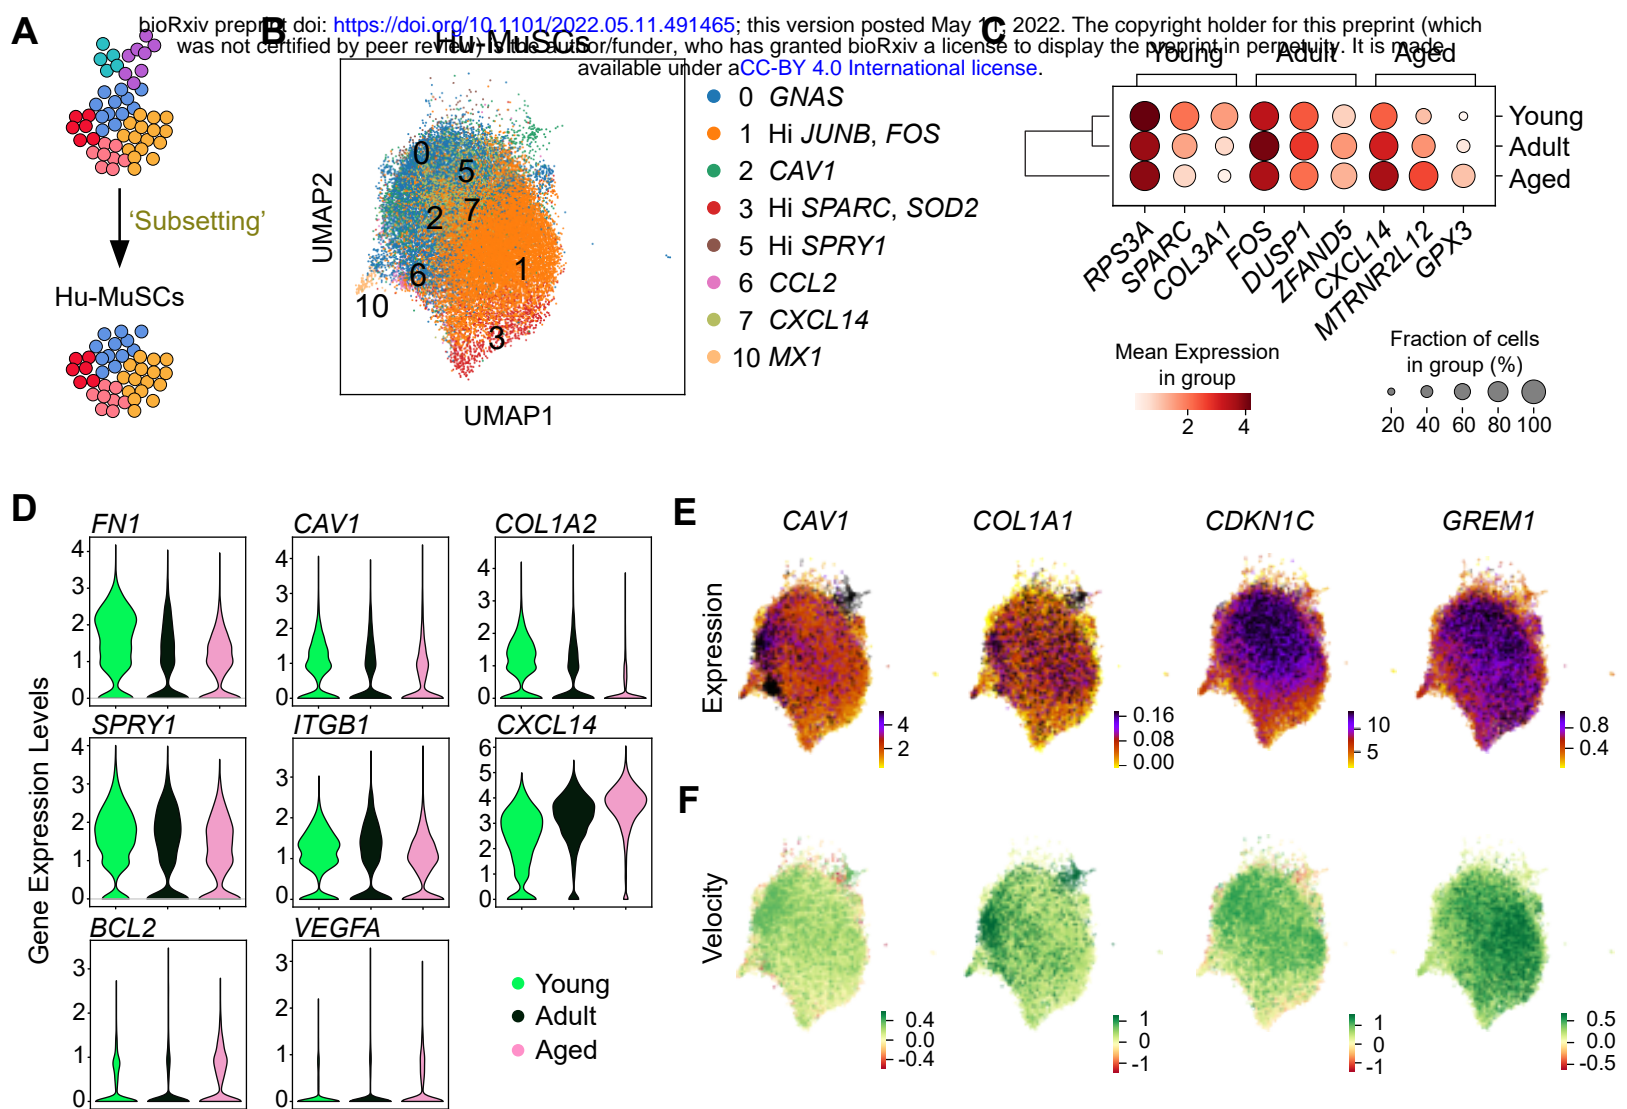

**Figure 2**

UP

DOWN

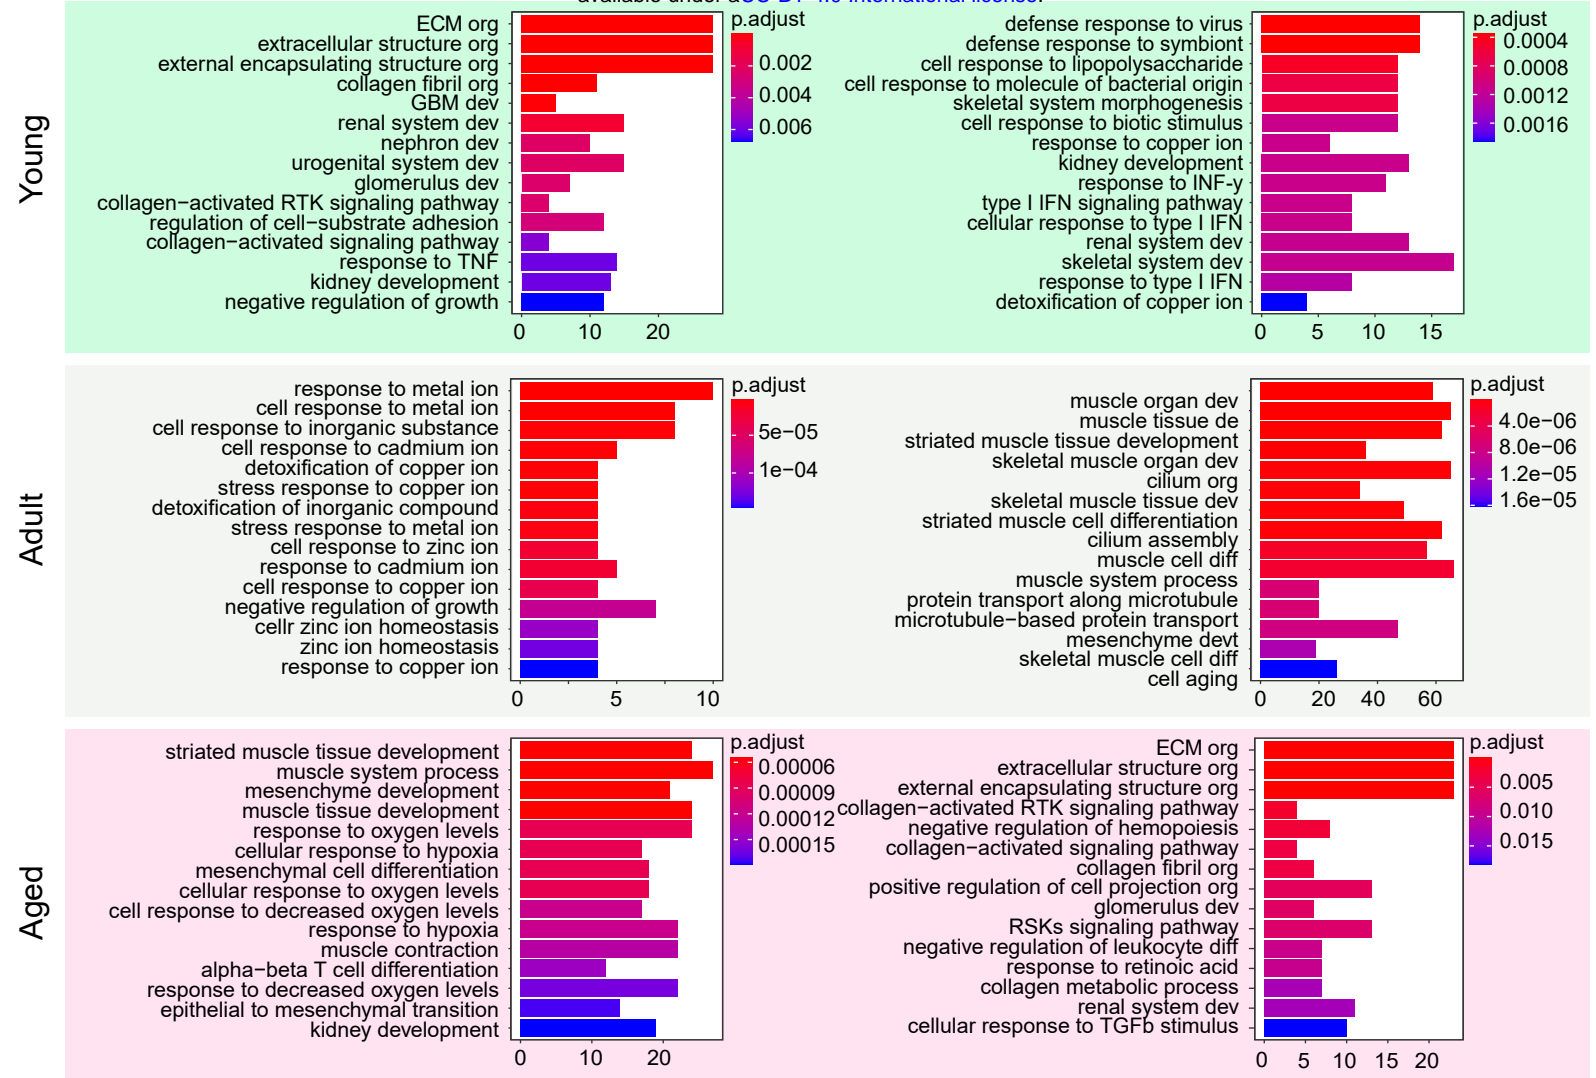

Figure 3

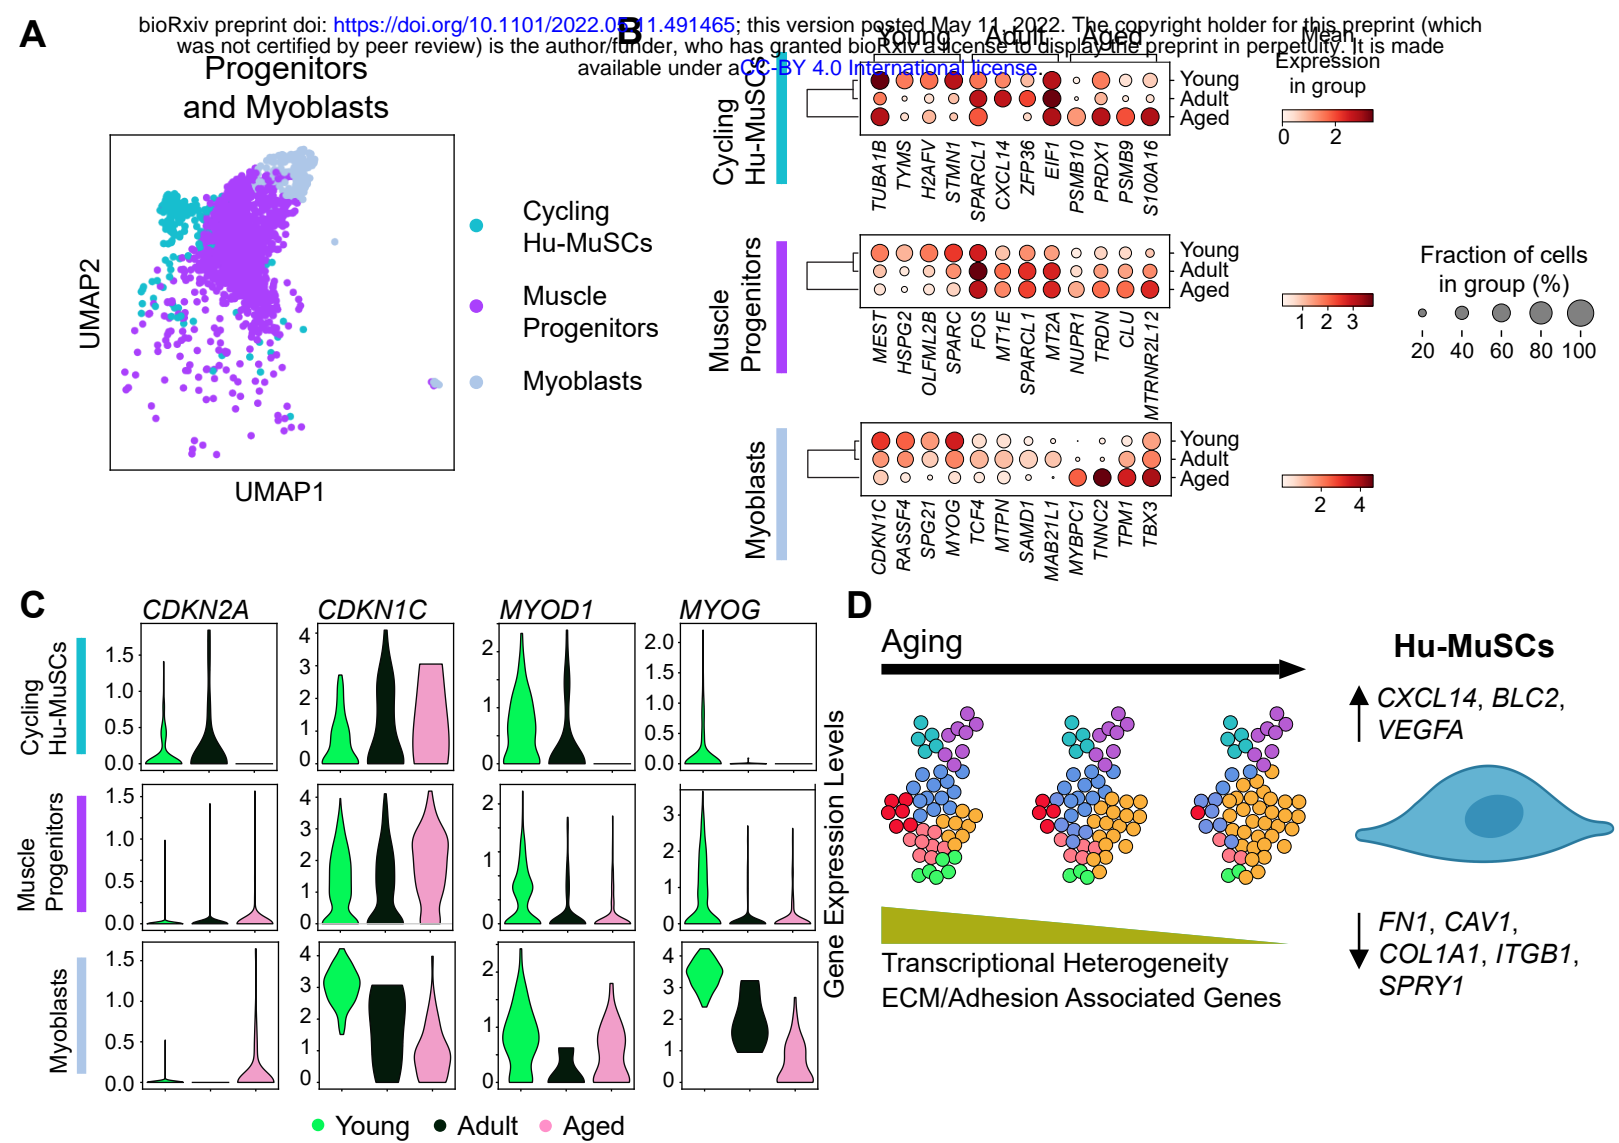

Figure 4

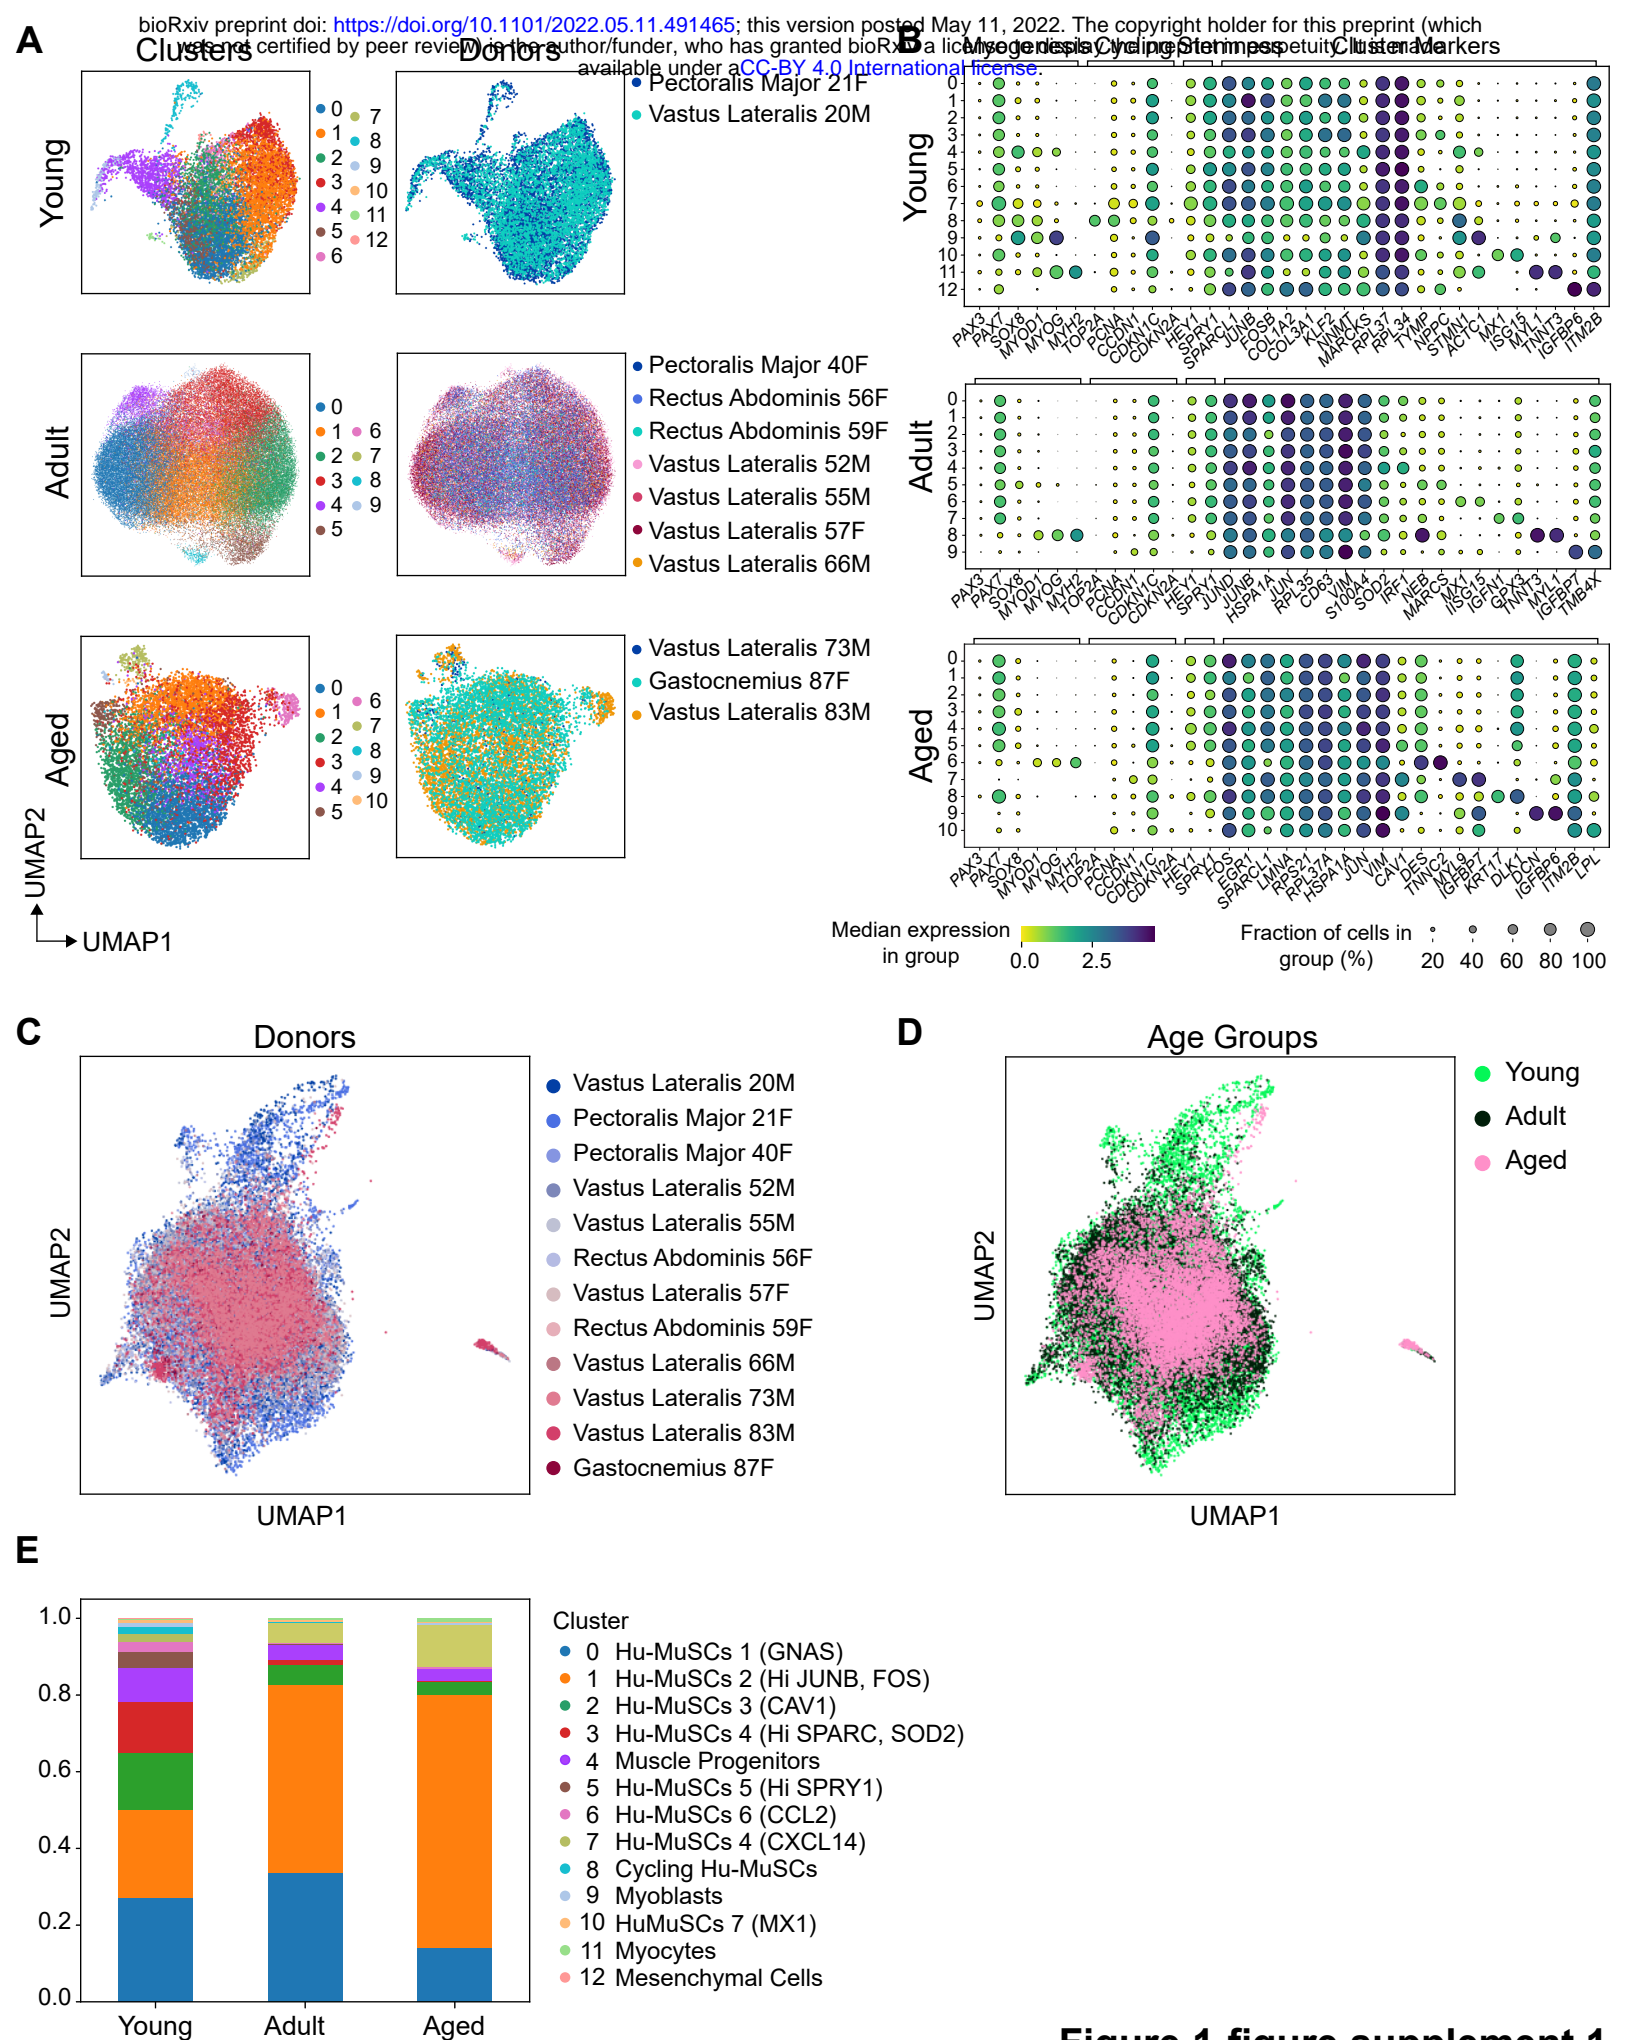

Figure 1-figure supplement 1



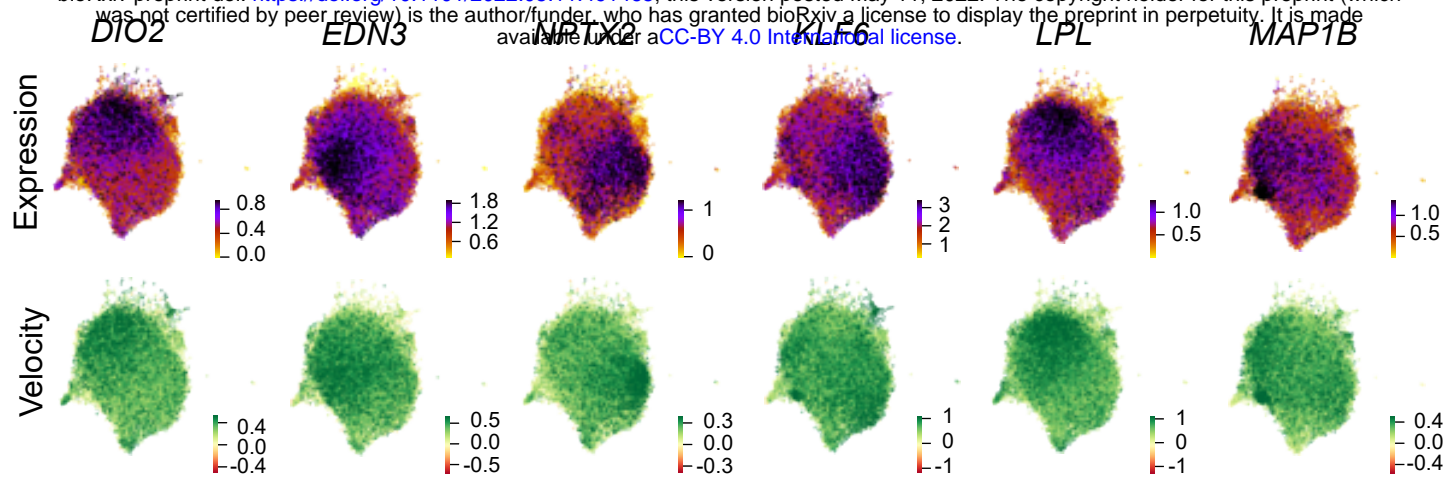

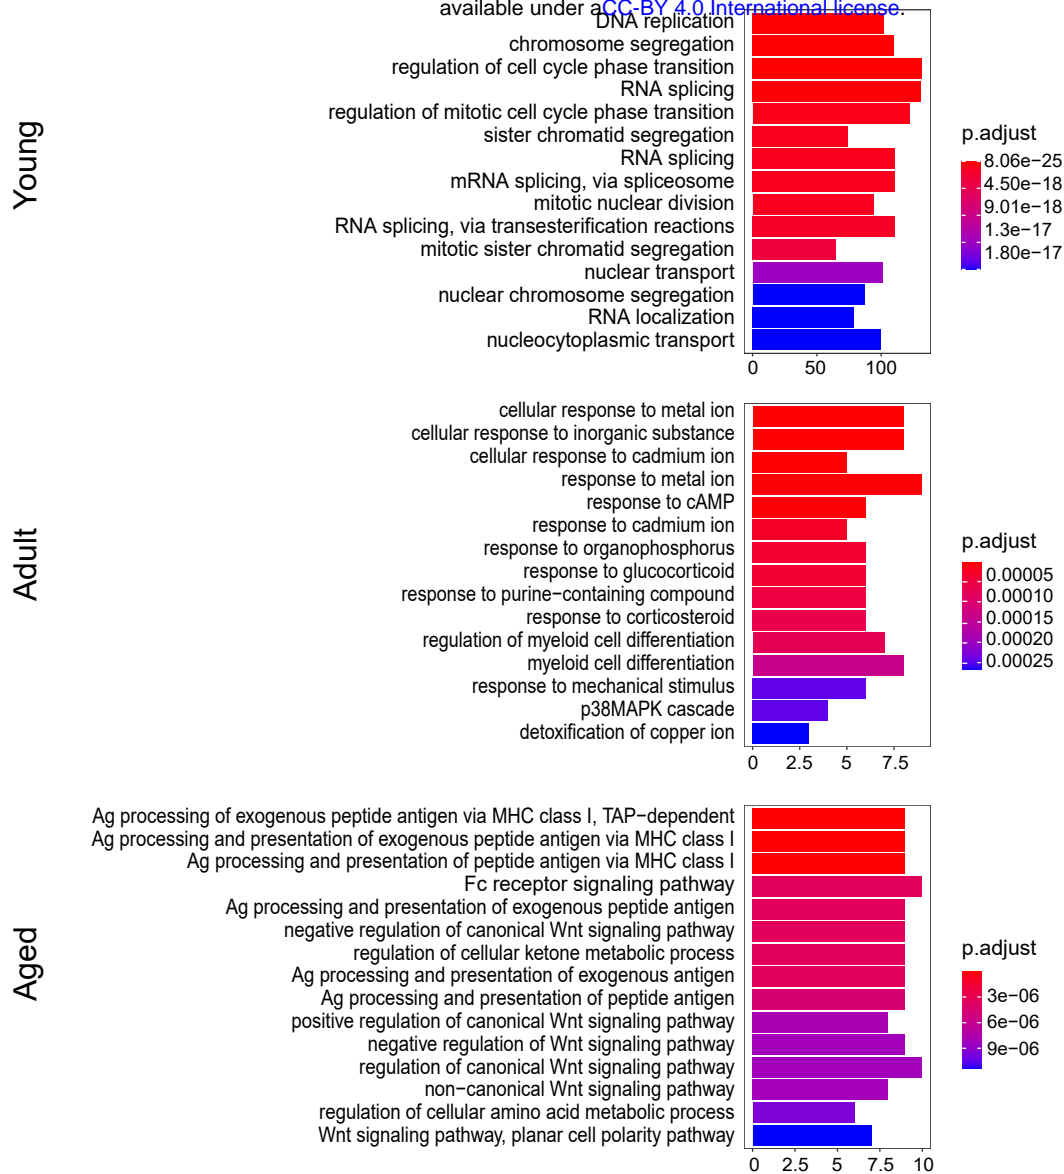

Figure 4-figure supplement 1

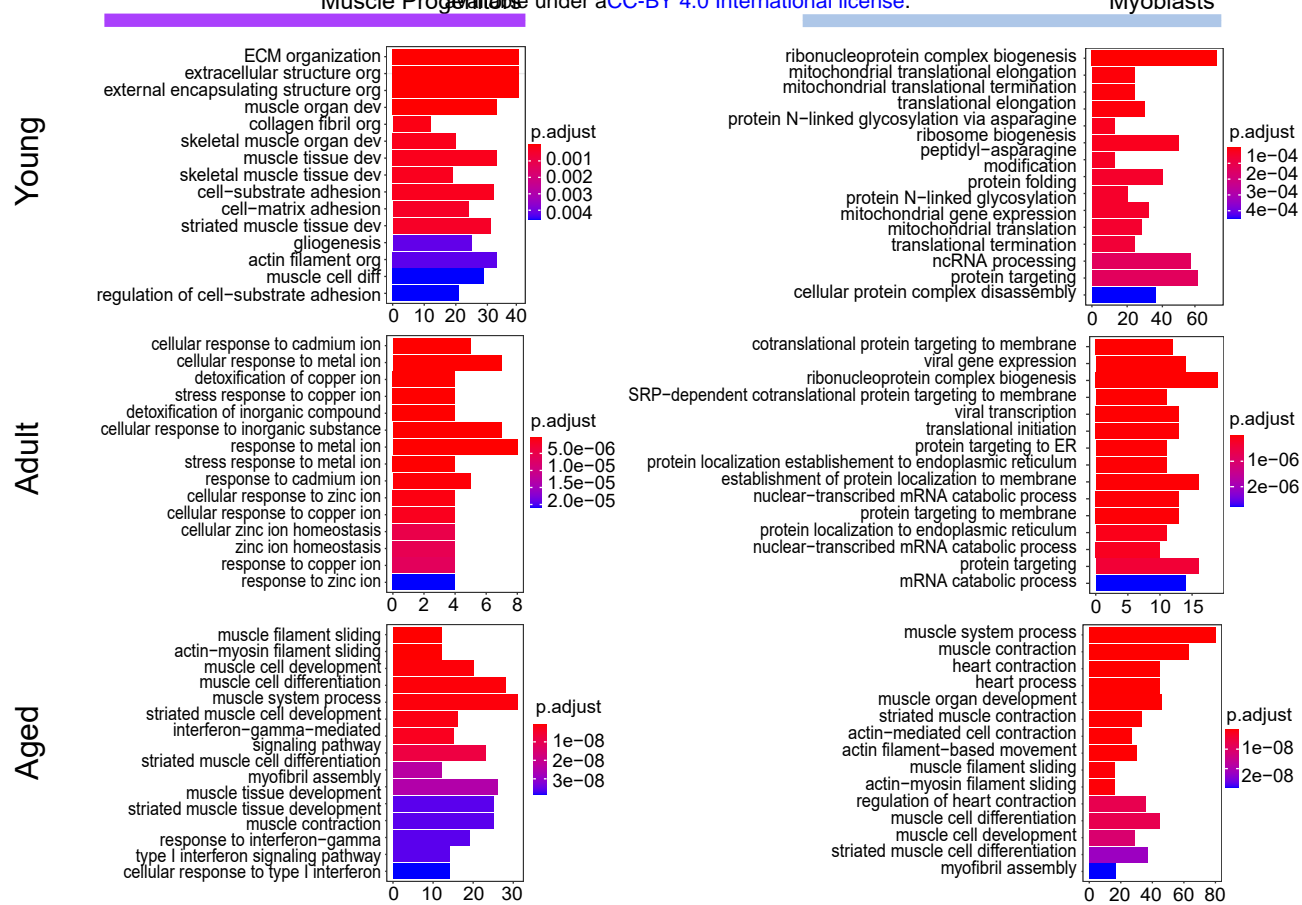

Figure 4-figure supplement 2
